# Supplementary material for: Extension of hydrogen borrowing alkylation reactions for the total synthesis of (−)-γ-lycorane
Source: Royal Society of Chemistry journal article supplement (doi:10.1039/d2cc01248k), 2022-01-01
Supplement: d2cc01248k1.pdf [file d2cc01248k1.pdf]

**Supporting Information for**  
**“Extension of hydrogen borrowing alkylation reactions for the total**  
**synthesis of (–)- $\gamma$ -Lycorane”**

*Christopher J. J. Hall, Indi S. Marriott, Kirsten. E. Christensen, Aaron J. Day, William R. F. Goundry and  
Timothy J. Donohoe*

**Contents**

|           |                                    |            |
|-----------|------------------------------------|------------|
| <b>1.</b> | <b>General Information</b>         | <b>S2</b>  |
| <b>2.</b> | <b>Experimental Procedures</b>     | <b>S4</b>  |
| <b>3.</b> | <b>NMR Comparison Tables</b>       | <b>S27</b> |
| <b>4.</b> | <b>NMR Spectra</b>                 | <b>S29</b> |
| <b>5.</b> | <b>Chiral HPLC Traces</b>          | <b>S45</b> |
| <b>6.</b> | <b>X-Ray Crystallographic Data</b> | <b>S45</b> |
| <b>7.</b> | <b>References</b>                  | <b>S47</b> |

## 1. General Information

Reactions were carried out in standard glassware under an atmosphere of air unless stated otherwise. Room temperature (rt) refers to 20-25 °C. Temperatures of 0 °C were obtained using an ice/water bath. High temperatures were obtained using an oil bath equipped with a contact thermometer.

Diethyl ether, CH<sub>2</sub>Cl<sub>2</sub>, DMF, and tetrahydrofuran were purified by filtration through activated alumina columns employing the method of Grubbs *et al.*<sup>1</sup> All other solvents and reagents were used as supplied without prior purification. All other reagents were used directly as supplied by major chemical suppliers, or following purification procedures described by Perrin and Armarego.<sup>2</sup>

Thin layer chromatography was performed on Merck Kieselgel 60 F<sub>254</sub> 0.25 mm pre-coated aluminium plates. Product spots were visualized under UV light ( $\lambda = 254$  nm) and/or by staining with potassium permanganate solution. Flash chromatography was performed using VWR silica gel 60 (40-63  $\mu$ m particle size) using head pressure by means of a nitrogen line.

NMR spectroscopy was carried out using Bruker 400 MHz or 500 MHz spectrometers in the deuterated solvent stated, using the residual non-deuterated solvent signal as an internal reference. Chemical shifts are quoted in ppm with signal splittings recorded as singlet (s), doublet (d), triplet (t), quartet (q), quintet (qn), sextet (sext), septet (sept), octet (oct), nonet (non) and multiplet (m). The abbreviation br denotes broad. Coupling constants,  $J$ , are measured to the nearest 0.1 Hz and are presented as observed.

Infrared spectra were recorded neat on a Bruker Tensor 27 spectrometer equipped with an attenuated total reflectance attachment with internal calibration. Absorption maxima ( $\lambda_{\text{max}}$ ) are quoted in wavenumbers (cm<sup>-1</sup>). The abbreviation br denotes broad.

Electrospray ionisation (ESI) HRMS were recorded on a Thermo Exactive orbitrap spectrometer equipped with a Waters Equity LC system, with a flow rate of 0.2 mL/min using water:methanol:formic acid (10:89.9:0.1) as eluent. The system uses a heated electrospray ionisation (HESI-II) probe for ESI<sup>+</sup> and has a resolution of 50,000 FWHM under conditions for maximum sensitivity, with an accuracy of better than 5 ppm for 24 h following external calibration on the day of analysis. The mass reported is that containing the most abundant isotopes, with each value rounded to 4 decimal places and within 5 ppm of the calculated mass. Electron impact ionisation (EI) HRMS were performed on an Agilent 7200 quadrupole time of flight (Q-ToF) instrument equipped with a direct insertion probe supplied by Scientific Instrument Manufacturer (SIM) GmbH. Instrument control and data processing were performed using Agilent MassHunter software. The mass reported is that containing the most abundant isotopes, with each value to 4 decimal places and within 5 ppm of the calculated mass.

Optical rotations were recorded on a Schmidt Haensch Unipol L2000 polarimeter in a cell with a path length of 1 dm (using the sodium D line, 589 nm). Concentrations are reported in g/100 mL. Temperatures are reported in °C.

Chiral normal phase HPLC was performed on an Agilent 1260 Series HPLC unit equipped with UV-vis diode-array detector, fitted with the appropriate Daicel Chiralpak column (dimensions: 0.46 cm  $\varnothing$  x 25 cm) along with the corresponding guard column (0.4 cm  $\varnothing$  x 1 cm). Wavelengths ( $\lambda$ ) are reported in nm, retention times ( $t_R$ ) are reported in minutes and solvent flow rates are reported in mL min<sup>-1</sup>.

## 2. Experimental Procedures

### (1*S*,2*S*)-*N*<sup>1</sup>-Neopentyl-1,2-diphenylethane-1,2-diamine, **4**

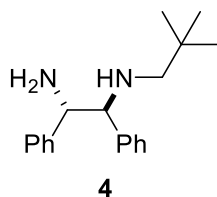

To a stirred solution of (1*S*,2*S*)-DPEN (182 mg, 0.86 mmol, 1.0 equiv.) in MeOH (2 mL) at rt was added pivaldehyde (103  $\mu$ L, 0.95 mmol, 1.1 equiv.) and the reaction left to stir for 1 h. The reaction was then cooled to 0 °C and NaBH<sub>4</sub> (65 mg, 1.72 mmol, 2.0 equiv.) was added portion-wise. The reaction was then warmed to rt and stirred for 1.5 h before being quenched by the addition of water (10 mL). The precipitated solid was collected by filtration and air-dried at 80 °C overnight to give the desired amine **4** (218 mg, 77%) as a colourless, amorphous powder.

<sup>1</sup>H NMR (CDCl<sub>3</sub>, 400 MHz)  $\delta$  = 7.25 – 7.06 (m, 10H), 3.97 (d, *J* = 7.0 Hz, 1H), 3.64 (d, *J* = 7.0 Hz, 1H), 2.17 (d, *J* = 11.2 Hz, 1H), 2.06 (d, *J* = 11.2 Hz, 1H), 0.85 (s, 9H).

<sup>13</sup>C NMR (CDCl<sub>3</sub>, 100 MHz)  $\delta$  = 143.8, 142.2, 128.2 (2C), 128.1 (2C), 127.9 (2C), 127.2 (2C), 127.0, 126.9, 70.6, 62.2, 60.2, 31.8, 27.9 (3C).

Data was consistent with that previously reported.<sup>3</sup>

### Benzyl (tosyloxy)carbamate, SI-1

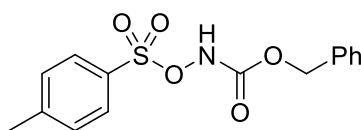

**SI-1**

To a stirred solution of  $\text{Na}_2\text{CO}_3$  (6.5 g, 60 mmol, 1.5 equiv.) in water (20 mL) was added hydroxylamine hydrochloride (3.2 g, 46 mmol, 1.15 equiv.), followed by a solution of benzyl chloroformate (5.63 mL, 40 mmol, 1.0 equiv.) in  $\text{CH}_2\text{Cl}_2$ . The reaction was stirred at rt for 4 h, after which the reaction was acidified to approximately pH 2 by the addition of conc. HCl, extracted with  $\text{CH}_2\text{Cl}_2$ , dried over  $\text{Na}_2\text{SO}_4$ , and concentrated *in vacuo* to give the crude product (5.88 g, 88%) as a colourless solid which was used without further purification. To a stirred solution of hydroxylamine (5.88 g, 35 mmol, 1.06 equiv.) and  $\text{Et}_3\text{N}$  (4.56 mL, 33 mmol, 1.0 equiv.) in THF (100 mL) at  $-15^\circ\text{C}$  was added TsCl (6.30 g, 33 mmol, 1.0 equiv.) in THF (50 mL) and the reaction left to stir for 30 min. Any precipitated solids were then filtered off and the filtrate concentrated *in vacuo* to give the crude product. Purification by column chromatography ( $\text{SiO}_2$ , dry load, pentane: $\text{Et}_2\text{O}$ , 67:33) gave the desired compound **SI-1** (7.99 g, 75%) as a colourless solid.

$^1\text{H NMR}$  ( $\text{CDCl}_3$ , 400 MHz)  $\delta$  = 7.85 – 7.80 (m, 2H), 7.35 – 7.32 (m, 2H), 7.28 – 7.16 (m, 5H), 5.02 (s, 2H), 2.42 (s, 3H).

$^{13}\text{C NMR}$  ( $\text{CDCl}_3$ , 100 MHz)  $\delta$  = 155.4, 146.2, 134.6, 130.3, 129.9 (2C), 129.7 (2C), 128.9 (2C), 128.7 (2C), 128.5, 68.8, 22.0.

Data was consistent with that previously reported.<sup>4</sup>

**Benzyl (1*S*,6*S*)-2-oxo-7-azabicyclo[4.1.0]heptane-7-carboxylate, 5**

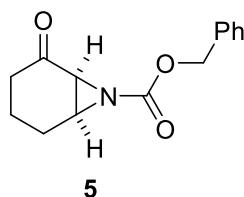

To a stirred solution of diamine catalyst **4** (1.13 g, 4 mmol, 0.2 equiv.), benzoic acid (2.44 g, 20 mmol, 1.0 equiv.), NaHCO<sub>3</sub> (8.4 g, 100 mmol, 5.0 equiv.), and protected hydroxylamine **SI-1** (6.42 g, 20 mmol, 1.0 equiv.) in CHCl<sub>3</sub> (200 mL) at rt was added 2-cyclohexen-1-one (5.82 mL, 60 mmol, 3.0 equiv.) and the reaction left to stir for 66 h. The reaction was then quenched by the addition of water (200 mL) and extracted with CH<sub>2</sub>Cl<sub>2</sub>. The combined organic layers were washed with brine, dried over Na<sub>2</sub>SO<sub>4</sub>, and concentrated *in vacuo*. The resulting oil was purified by column chromatography (SiO<sub>2</sub>, dry load, pentane:Et<sub>2</sub>O, 70:30) to give the desired compound (–)-**5** (3.17 g, 64%, 98:2 er) as a pale yellow oil.

<sup>1</sup>H NMR (CDCl<sub>3</sub>, 400 MHz) δ = 7.42 – 7.29 (m, 5H), 5.14 (d, J = 0.9 Hz, 2H), 3.15 (dtd, J = 5.7, 2.3, 0.9 Hz, 1H), 2.99 (d, J = 5.8 Hz, 1H), 2.55 – 2.44 (m, 1H), 2.32 – 2.21 (m, 1H), 2.12 – 2.01 (m, 1H), 2.01 – 1.90 (m, 1H), 1.80 (dddd, J = 14.3, 11.0, 4.8, 2.2 Hz, 1H), 1.71 – 1.59 (m, 1H).

<sup>13</sup>C NMR (CDCl<sub>3</sub>, 100 MHz) δ = 203.8, 161.7, 135.5, 128.8 (2C), 128.7 (2C), 128.5, 68.8, 43.1, 40.8, 37.0, 22.7, 17.3.

[α]<sub>D</sub><sup>25</sup> = – 79.5 (c = 1.00, CHCl<sub>3</sub>).

**Chiral HPLC** (Chiralpak AD with guard, 10.0 % IPA, 90.0 % hexane, 1.0 mL/min, 25 °C, λ = 210 nm, 10 μL injection, t<sub>r</sub>(major) = 10.1 min, t<sub>r</sub>(minor) = 8.7 min).

Data (including er) was consistent with that previously reported.<sup>5</sup>

**Benzyl (1S,2R,6S)-2-hydroxy-7-azabicyclo[4.1.0]heptane-7-carboxylate, 6**

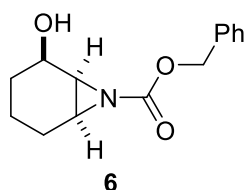

To a stirred solution of aziridine (–)-**5** (2.45 g, 10 mmol, 1.0 equiv.) in MeOH (100 mL) at –17 °C was added NaBH<sub>4</sub> (0.76 g, 20 mmol, 2.0 equiv.) portion-wise and the solution left to stir for 2 h. The reaction was then quenched by the addition of sat. aq. NaHCO<sub>3</sub>, extracted with EtOAc, dried over Na<sub>2</sub>SO<sub>4</sub>, and concentrated in vacuo. Purification by column chromatography (SiO<sub>2</sub>, eluent load, pentane:Et<sub>2</sub>O, 40:60) gave the desired compound **6** (1.9 g, 77%) as a waxy solid, and as a 2.3:1 mixture of alcohol diastereomers.

<sup>1</sup>H NMR (CDCl<sub>3</sub>, 400 MHz) δ = 7.41 – 7.28 (m, 7H), 5.14 (s, 2H), 5.12 (s, 0.8H), 4.11 (dt, J = 7.2, 5.0 Hz, 0.4H), 4.03 – 3.94 (m, 1H), 2.99 – 2.87 (m, 2H), 2.77 (ddd, J = 5.8, 4.3, 1.3 Hz, 0.4H), 2.66 (dd, J = 6.1, 0.9 Hz, 0.4H), 2.14 (ddd, J = 9.9, 4.6, 2.5 Hz, 1H), 2.05 – 1.91 (m, 0.8H), 1.91 – 1.68 (m, 2.4H), 1.60 – 1.34 (m, 3.4H), 1.34 – 1.14 (m, 1.8H).

<sup>13</sup>C NMR (CDCl<sub>3</sub>, 100 MHz) δ = 165.6 (*minor*), 163.5 (*major*), 136.0 (*minor*), 135.9 (*major*), 128.7 (2C, *major*), 128.6 (2C, *minor*), 128.5 (2C, *major*), 128.5 (2C, *minor*), 128.4 (*minor*), 128.3 (*major*), 68.4 (*major*), 68.3 (*minor*), 66.0 (*minor*), 65.2 (*major*), 42.4 (*major*), 42.0 (*minor*), 40.2 (*major*), 38.2 (*minor*), 29.7 (*minor*), 29.6 (*major*), 23.5 (*minor*), 22.8 (*major*), 18.2 (*major*), 15.0 (*minor*).

IR ν<sub>max</sub> (film)/cm<sup>-1</sup> 3401, 2941, 1723, 1688, 1278, 1216, 1055, 752, 699.

HRMS (ESI<sup>+</sup>) C<sub>14</sub>H<sub>17</sub>O<sub>3</sub>NNa requires 270.1101, found [M+Na]<sup>+</sup> 270.1101 (Δ 0.24 ppm).

M.p. 58 – 60 °C.

**(1*S*,2*R*,6*S*)-7-(Benzo[d][1,3]dioxol-5-ylmethyl)-7-Azabicyclo[4.1.0]heptan-2-ol, **8****

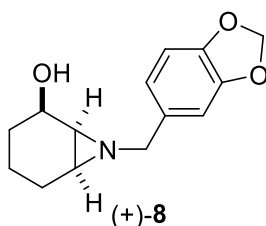

To a stirred solution of enantioenriched cyclic aziridine alcohol **6** (1.73 g, 7 mmol, 1.0 equiv.) in MeOH (30 mL) at rt was added  $K_2CO_3$  (1.45 g, 10.5 mmol, 1.5 equiv.) and the reaction left to stir for 1 h. The reaction mixture was then passed through a short plug of silica, eluting with MeOH, to remove excess  $K_2CO_3$  before being concentrated *in vacuo* to give a crude oil which was then dissolved in DMF (30 mL). To this mixture was added  $K_2CO_3$  (2.42 g, 17.5 mmol, 2.5 equiv.) and piperonyl bromide **7** (3.00 g, 14 mmol, 2.0 equiv.) and the reaction left to stir at rt for 2.5 h. The reaction was then quenched by the addition of water (30 mL), extracted with EtOAc (3 × 30 mL) and washed with brine (3 × 50 mL) before being dried over  $Na_2SO_4$ , and concentrated *in vacuo* to give the crude product. Purification by column chromatography ( $SiO_2$ , eluent load, pentane:Et<sub>2</sub>O, 50:50 to 30:70) gave the desired product (+)-**8** as a separable mixture of diastereomers in a 2.7:1 ratio (1.30 g, 75%).

<sup>1</sup>H NMR ( $CDCl_3$ , 400 MHz)  $\delta$  = 6.88 (d,  $J$  = 3.7 Hz, 1H), 6.76 (d,  $J$  = 5.7 Hz, 2H), 5.94 (d,  $J$  = 2.7 Hz, 2H), 4.03 (t,  $J$  = 5.7 Hz, 1H), 3.94 (dq,  $J$  = 10.2, 5.2 Hz, 1H), 3.37 (t,  $J$  = 4.4 Hz, 1H), 2.38 – 2.28 (m, 1H), 2.02 (t,  $J$  = 5.8 Hz, 1H), 1.95 (t,  $J$  = 5.4 Hz, 1H), 1.81 (ddt,  $J$  = 15.1, 9.5, 5.4 Hz, 1H), 1.68 – 1.60 (m, 2H), 1.44 (ddtt,  $J$  = 15.3, 7.7, 5.2, 2.7 Hz, 1H), 1.18 (ddt,  $J$  = 11.0, 7.3, 4.3 Hz, 1H).

<sup>13</sup>C NMR ( $CDCl_3$ , 100 MHz)  $\delta$  = 147.8, 133.4, 121.2, 120.7, 108.7, 108.3, 101.1, 64.3, 64.1, 43.0, 42.1, 30.8, 23.9, 16.9.

IR  $\nu_{max}$  (film)/ $cm^{-1}$  = 3406, 2935, 1503, 1490, 1441, 1374, 1241, 1100, 1039, 927, 808.

HRMS (ESI<sup>+</sup>)  $C_{14}H_{18}O_3N$  requires 248.12812, found  $[M+H]^+$  248.12815 ( $\Delta$  0.16 ppm).

M.p. = 82 – 84 °C.

$[\alpha]_D^{25}$  = +19.0 ( $c$  = 1.00,  $CHCl_3$ ).



**1-(2,3,4,5,6-Pentamethylphenyl)ethan-1-one, 9**

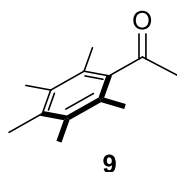

To a stirred solution of pentamethylbenzene (10.0 g, 67.6 mmol, 1.0 eq.) and acetyl bromide (5.48 mL, 74.3 mmol, 1.1 eq.) in CH<sub>2</sub>Cl<sub>2</sub> (675 mL) at 0 °C was added AlCl<sub>3</sub> (11.25 g, 84.5 mmol, 1.25 eq.) portionwise. After stirring for 30 min, the reaction was poured into water (cooled with a water-ice bath) and the layers were separated. The aqueous layer was extracted with CH<sub>2</sub>Cl<sub>2</sub> and the combined organic layers washed with sat. NaHCO<sub>3</sub>, dried over MgSO<sub>4</sub> and concentrated *in vacuo*. Purification by column chromatography (SiO<sub>2</sub>, dry load, pentane:Et<sub>2</sub>O, 90:10) gave the desired compound **9** as a white solid (12.0 g, 93%) that may be recrystallised from hexane.

<sup>1</sup>H NMR (CDCl<sub>3</sub>, 400 MHz) δ = 2.46 (s, 3H), 2.24 (s, 3H), 2.19 (s, 6H), 2.14 (s, 6H).

<sup>13</sup>C NMR (CDCl<sub>3</sub>, 100 MHz) δ = 210.2, 141.1, 135.5, 133.2 (2C), 127.1 (2C), 33.3, 17.2 (2C), 16.8, 16.1 (2C).

The spectral data matched that previously reported in the literature.<sup>6</sup>

**2-((1*R*,2*S*,6*S*)-7-(Benzo[d][1,3]dioxol-5-ylmethyl)-7-Azabicyclo[4.1.0]heptan-2-yl)-1-(2,3,4,5,6-pentamethylphenyl)ethan-1-one, **11****

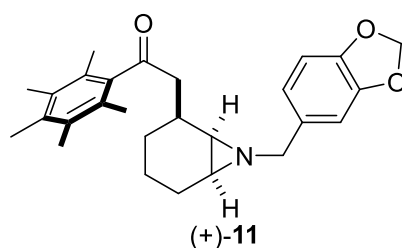

To a 2–5 mL Biotage<sup>®</sup> microwave vial equipped with a stirrer bar was added cyclic aziridine alcohol (+)-**8** 248 mg, 1.04 mmol), [Cp\*IrCl<sub>2</sub>]<sub>2</sub> (11.1 mg, 0.013 mmol, 2.0 mol%), Ph\* methyl ketone (132 mg, 0.696 mmol) and KOH (78.1 mg, 1.39 mmol) sequentially in the open atmosphere. The reaction vessel was sealed with a microwave vial cap (containing a Reseal<sup>™</sup> septum) and an argon balloon fitted. The vial was heated to the 85 °C in a preheated oil bath for 16 h. The mixture was cooled to rt, filtered through a SiO<sub>2</sub> plug (eluting with Et<sub>2</sub>O) and concentrated in vacuo. Purification by column chromatography (SiO<sub>2</sub>, dry load, pentane:Et<sub>2</sub>O, 80:20) gave a single diastereomer (+)-**11** (223 mg, 53%, 98:2 er) as a pale yellow oil.

<sup>1</sup>H NMR (CDCl<sub>3</sub>, 400 MHz) δ = 6.87 (s, 1H), 6.72 (s, 2H), 5.90 (d, J = 1.3 Hz, 1H), 5.83 (d, J = 1.3 Hz, 1H), 3.48 (d, J = 13.3 Hz, 1H), 3.10 (d, J = 13.4 Hz, 1H), 2.82 – 2.54 (m, 2H), 2.41 (dq, J = 12.4, 7.2, 6.3 Hz, 1H), 2.22 (s, 3H), 2.17 (s, 6H), 2.06 (s, 6H), 1.90 (dd, J = 6.5, 4.1 Hz, 1H), 1.70 (t, J = 6.0 Hz, 1H), 1.64 (s, 2H), 1.44 (dt, J = 7.2, 4.9 Hz, 2H), 1.28 – 1.01 (m, 2H).

<sup>13</sup>C NMR (CDCl<sub>3</sub>, 100 MHz) δ = 211.8, 147.5, 146.3, 140.7, 135.2, 133.9, 133.0 (2C), 127.2 (2C), 121.0, 108.6, 107.9, 100.8, 64.4, 53.5, 50.4, 42.1, 39.8, 29.5, 26.5, 24.1, 20.8 (2C), 17.1, 16.7 (2C).

IR  $\nu_{\text{max}}$  (film)/cm<sup>-1</sup> = 2929, 1698, 1503, 1489, 1442, 1376, 1245, 1100, 1039, 928, 807.

HRMS (ESI<sup>+</sup>) C<sub>27</sub>H<sub>34</sub>O<sub>3</sub>N requires 420.25332, found [M+H]<sup>+</sup> 420.25206 ( $\Delta$  –3.04 ppm).

[ $\alpha$ ]<sub>D</sub><sup>25</sup> = +20.0 (c = 1.00, CHCl<sub>3</sub>).

Chiral HPLC (Chiralpak IA with guard, 5.0 % IPA, 95.0 % hexane, 1.0 mL/min, 25 °C,  $\lambda$  = 210 nm, 10  $\mu$ L injection, t<sub>r</sub>(major) = 8.0 min, t<sub>r</sub>(minor) = 7.5 min).

## 2-Iodocyclohex-2-en-1-one, **12**

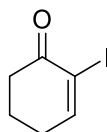

**12**

To a stirred solution of cyclohexenone (1.0 mL, 10 mmol, 1.0 equiv.) in THF-water (1:1, 50 mL) was added sequentially  $K_2CO_3$  (1.66 g, 12 mmol, 1.2 equiv.),  $I_2$  (3.8 g, 15 mmol, 1.5 equiv.) and DMAP (240 mg, 2.0 mmol, 0.2 equiv.) and the reaction left to stir for 1 h. The reaction mixture was then poured into EtOAc (100 mL), washed with sat. aq.  $Na_2S_2O_3$  ( $2 \times 100$  mL), 0.1 M aq. HCl (200 mL) and brine. Drying over  $MgSO_4$  and concentration *in vacuo* yielded crude **12**. Purification by column chromatography ( $SiO_2$ , dry load, pentane:EtOAc, 90:10) gave the desired compound **12** (1.44 g, 65%) as a pale yellow solid that slowly decomposed when stored at rt.

$^1H$  NMR ( $CDCl_3$ , 400 MHz)  $\delta$  = 7.77 (t,  $J$  = 4.5 Hz, 1H), 2.71 – 2.60 (m, 2H), 2.49 – 2.37 (m, 2H), 2.08 (tt,  $J$  = 6.3 Hz, 2H).

$^{13}C$  NMR ( $CDCl_3$ , 100 MHz)  $\delta$  = 192.4, 159.6, 104.0, 37.4, 30.1, 23.0.

Data was consistent with that previously reported.<sup>7</sup>

### Piperonyl bromide, **7**

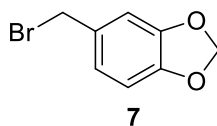

To a stirred solution of piperonyl alcohol (3.04 g, 20 mmol, 1.0 equiv.) in Et<sub>2</sub>O (30 mL) at 0 °C was added PBr<sub>3</sub> (2.07 mL, 22 mmol, 1.1 equiv.) in Et<sub>2</sub>O (25 mL) *via* a dropping funnel over the course of 15 min. After stirring for an additional 30 min, the reaction was quenched by the addition of water (50 mL) and the layers were separated. The aqueous layer was extracted with Et<sub>2</sub>O (3 × 30 mL) and the organic layers were combined, washed with brine (30 mL), dried over Na<sub>2</sub>SO<sub>4</sub>, and concentrated *in vacuo* to give the desired product **7** (4.15 g, 97%) as a colourless solid without any additional purification.

<sup>1</sup>H NMR (CDCl<sub>3</sub>, 400 MHz) δ = 6.90 – 6.84 (m, 2H), 6.75 (dd, J = 7.8, 0.6 Hz, 1H), 5.97 (s, 2H), 4.46 (s, 2H).

<sup>13</sup>C NMR (CDCl<sub>3</sub>, 100 MHz) δ = 148.1, 148.0, 131.7, 122.9, 109.6, 108.5, 101.5, 34.3.

Data for **7** was consistent with that previously reported.<sup>8</sup>

**(1*RS*,2*SR*,6*RS*)-7-(Benzo[d][1,3]dioxol-5-ylmethyl)-7-Azabicyclo[4.1.0]heptan-2-one, 14**

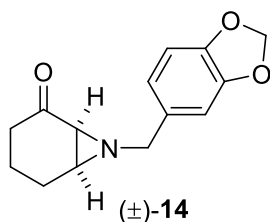

2-Iodocyclohex-2-en-1-one **12** (2.21 g, 10 mmol), Cs<sub>2</sub>CO<sub>3</sub> (3.87 g, 10 mmol), phenanthroline (1.8 g, 10 mmol) and piperonylamine (**13**) (1.87 mL, 15 mmol) were added sequentially to CH<sub>2</sub>Cl<sub>2</sub> (75 mL) at rt and left to stir 4 h, after which another 0.5 equiv. of Cs<sub>2</sub>CO<sub>3</sub> (1.93 g, 5 mmol) was added. After a further 4 h, 0.5 equiv. of phenanthroline (0.9 g, 5 mmol) were added and the reaction left to stir for 16 h. The resulting mixture was then diluted with CH<sub>2</sub>Cl<sub>2</sub> (75 mL), washed with water (100 mL), dried over MgSO<sub>4</sub>, and concentrated *in vacuo* to give the crude product. Purification by column chromatography (SiO<sub>2</sub>, dry load, pentane:Et<sub>2</sub>O, 70:30) gave the desired product **14** (2.32 g, 95%) as a yellow oil.

<sup>1</sup>H NMR (CDCl<sub>3</sub>, 400 MHz) δ = 6.84 (s, 1H), 6.75 (t, J = 6.3 Hz, 2H), 5.94 (s, 2H), 3.66 (d, J = 13.4 Hz, 1H), 3.28 (d, J = 13.4 Hz, 1H), 2.54 – 2.38 (m, 1H), 2.29 (d, J = 2.9 Hz, 1H), 2.15 – 1.90 (m, 4H), 1.80 – 1.51 (m, 2H).

<sup>13</sup>C NMR (CDCl<sub>3</sub>, 100 MHz) δ = 207.8, 147.8, 146.8, 132.4, 120.9, 108.4, 108.2, 101.1, 63.3, 46.4, 43.8, 37.2, 23.3, 18.9.

IR ν<sub>max</sub> (film)/cm<sup>-1</sup> = 2940, 1703, 1503, 1490, 1442, 1250, 1235, 1100, 1084, 1037, 927, 808.

HRMS (ESI<sup>+</sup>) C<sub>14</sub>H<sub>16</sub>O<sub>3</sub>N requires 246.11247, found [M+H]<sup>+</sup> 246.11245 (Δ -0.05 ppm).

**(4-((*tert*-Butyldimethylsilyl)oxy)phenyl)(4-methoxyphenyl)methanol, **15****

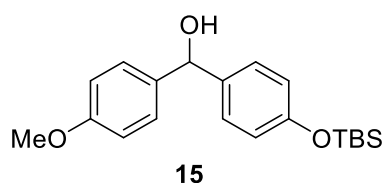

To a stirred solution of 4-hydroxybenzaldehyde (3.74 g, 20.0 mmol, 1.0 equiv.) in DMF (50 mL) at rt was sequentially added TBSCl (3.00 g, 20.0 mmol, 1.0 equiv.) and imidazole (1.63 g, 24.0 mmol, 1.2 equiv.), and the reaction left to stir for 1 h. The reaction was quenched by the addition of water (100 mL) and extracted with EtOAc (3 × 50 mL). The combined organic extracts were then washed with brine (3 × 50 mL), dried over MgSO<sub>4</sub>, and concentrated *in vacuo* to give the desired product **SI-2** (4.72 g, 99%) that was used without further purification.

To a stirred solution of 4-bromoanisole (3.74 g, 20.0 mmol, 1.0 equiv.) in THF (90 mL) at -78 °C was added 2.5 M *n*BuLi in hexanes (8.0 mL, 20.0 mmol, 1.0 equiv.) dropwise and the reaction stirred for 2 h. 4-((*tert*-Butyldimethylsilyl)oxy)benzaldehyde **SI-2** (4.72 g, 20.0 mmol, 1.0 equiv.) in THF (5 mL) was added and the reaction warmed to rt over the course of 1.5 h. The reaction was quenched by the addition of water (100 mL) and extracted with EtOAc (3 × 50 mL). The combined organic extracts were then washed with brine, dried over MgSO<sub>4</sub>, and concentrated *in vacuo*. Purification by column chromatography (SiO<sub>2</sub>, eluent load, CH<sub>2</sub>Cl<sub>2</sub>) gave the desired compound **15** (3.46 g, 50%) as a clear oil.

<sup>1</sup>H NMR (CDCl<sub>3</sub>, 400 MHz) δ = 7.27 (d, J = 8.4 Hz, 2H), 7.20 (d, J = 8.2 Hz, 2H), 6.86 (d, J = 8.5 Hz, 2H), 6.79 (d, J = 8.2 Hz, 2H), 5.76 (d, J = 3.3 Hz, 1H), 3.79 (s, 3H), 0.97 (s, 9H), 0.18 (s, 6H).

<sup>13</sup>C NMR (CDCl<sub>3</sub>, 100 MHz) δ = 159.1, 155.2, 137.0, 136.5, 127.9 (2C), 127.8 (2C), 120.1 (2C), 113.9 (2C), 75.6, 55.4, 25.8, 18.3 (6C), -4.3 (2C).

Data was consistent with that previously reported.<sup>9</sup>

**(1*RS*,2*SR*,6*RS*)-7-(Benzo[d][1,3]dioxol-5-ylmethyl)-7-Azabicyclo[4.1.0]heptan-2-ol, **8****

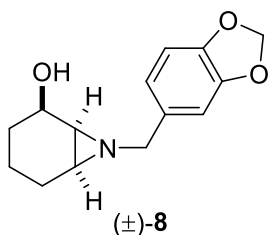

To a stirred solution of cyclic aziridine ketone **14** (980 mg, 4.00 mmol) in MeOH (20 mL) at 0 °C was added NaBH<sub>4</sub> portion-wise (3 × 181 mg, 3 × 4.80 mmol) and the reaction left to stir for 3 h until completion was indicated by TLC. After being quenched by the addition of water (20 mL), extraction with Et<sub>2</sub>O (3 × 30 mL), drying with MgSO<sub>4</sub>, and concentration *in vacuo* afforded the pure product (±)-**8** (989 mg, quant.) as a creamy solid.

Data matched that which was reported for the synthesis of enantioenriched (+)-**8**.

**2-((1*RS*,2*SR*,6*SR*)-7-(Benzo[d][1,3]dioxol-5-ylmethyl)-7-Azabicyclo[4.1.0]heptan-2-yl)-1-(2,3,4,5,6-pentamethylphenyl)ethan-1-one, **11****

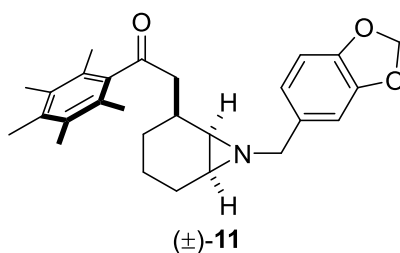

**Two-Step procedure**

To a 2–5 mL Biotage<sup>®</sup> microwave vial equipped with a stirrer bar was added (±)-**8** (147 mg, 0.594 mmol), [Cp\*IrCl<sub>2</sub>]<sub>2</sub> (6.3 mg, 0.0079 mmol, 2.0 mol%), Ph\* methyl ketone (75.4 mg, 0.396 mmol) and KOH (44.5 mg, 0.793 mmol) sequentially in the open atmosphere. The reaction vessel was sealed with a microwave vial cap (containing a Reseal<sup>™</sup> septum) and an argon balloon fitted. The vial was heated to the required temperature (85 °C) in a preheated oil bath for 16 h. The mixture was cooled to rt, filtered through a SiO<sub>2</sub> plug (eluting with Et<sub>2</sub>O) and concentrated in vacuo. Purification by column chromatography (SiO<sub>2</sub>, dry load, pentane:Et<sub>2</sub>O, 80:20) gave a single diastereomer (±)-**11** (151 mg, 60%) as a yellow oil.

**One-Step procedure using hydride donor **15****

To a 2–5 mL Biotage<sup>®</sup> microwave vial equipped with a stirrer bar was added Cyclic aziridine ketone **14** (221 mg, 0.901 mmol), [Cp\*IrCl<sub>2</sub>]<sub>2</sub> (9.6 mg, 0.012 mmol, 2.0 mol%), Ph\* methyl ketone (114 mg, 0.601 mmol) and KOH (67.4 mg, 1.20 mmol) sequentially in the open atmosphere. The reaction vessel was sealed with a microwave vial cap (containing a Reseal<sup>™</sup> septum) and an argon balloon fitted. The vial was heated to the required temperature (85 °C) in a preheated oil bath for 16 h. The mixture was cooled to rt, filtered through a SiO<sub>2</sub> plug (eluting with Et<sub>2</sub>O) and concentrated in vacuo. Purification by column chromatography (SiO<sub>2</sub>, dry load, pentane:Et<sub>2</sub>O, 80:20) gave a single diastereomer (±)-**11** (204 mg, 54%) as a yellow oil.

Data matched that which was reported for the synthesis of enantioenriched (+)-**11**.



**(3a*S*,7*R*,7a*R*)-7-Bromo-1-((6-bromobenzo[d][1,3]dioxol-5-yl)methyl)octahydro-2H-indol-2-one, 16**

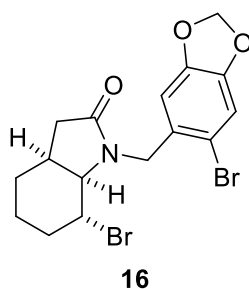

**Enantioenriched**

To a 2–5 mL Biotage<sup>®</sup> microwave vial equipped with a stirrer bar was added cyclic aziridine ketone (+)-**11** (100 mg, 0.238 mmol) and CH<sub>2</sub>Cl<sub>2</sub> (1.2 mL, 0.2 M) sequentially in the open atmosphere. The reaction vessel was sealed with a microwave vial cap (containing a Reseal<sup>™</sup> septum) and cooled to –17 °C (ice/NaCl bath). Following this, Br<sub>2</sub> (114 mg, 0.715 mmol) was added dropwise and the mixture stirred 15 min. The reaction was then quenched with *n*-BuOH (88.3 mg, 1.19 mmol), diluted with Et<sub>2</sub>O (5 mL) and water (3 mL). The layers were separated, and the aqueous layer extracted with Et<sub>2</sub>O three times. The combined organics were washed with sat. aq. Na<sub>2</sub>S<sub>2</sub>O<sub>3</sub>, sat. aq. NaHCO<sub>3</sub>, brine, dried over MgSO<sub>4</sub> and concentrated *in vacuo*. Purification by column chromatography (SiO<sub>2</sub>, dry load, Et<sub>2</sub>O) gave the desired compound (–)-**16** (42 mg, 40%) as a yellow oil.

**Racemic**

To a 2–5 mL Biotage<sup>®</sup> microwave vial equipped with a stirrer bar was added cyclic aziridine ketone (±)-**11** (126 mg, 0.300 mmol) and CH<sub>2</sub>Cl<sub>2</sub> (1.5 mL, 0.2 M) sequentially in the open atmosphere. The reaction vessel was sealed with a microwave vial cap (containing a Reseal<sup>™</sup> septum) and cooled to –17 °C (ice/NaCl bath). Following this, Br<sub>2</sub> (144 mg, 0.901 mmol) was added dropwise and the mixture stirred 15 min. The reaction was then quenched with *n*-BuOH (111 mg, 1.50 mmol), diluted with Et<sub>2</sub>O (5 mL) and water (3 mL). The layers were separated, and the aqueous layer extracted with Et<sub>2</sub>O three times. The combined organics were washed with sat. aq. Na<sub>2</sub>S<sub>2</sub>O<sub>3</sub>, sat. aq. NaHCO<sub>3</sub>, brine, dried over MgSO<sub>4</sub> and concentrated *in vacuo*. Purification by column chromatography (SiO<sub>2</sub>, dry load, Et<sub>2</sub>O) gave the desired compound (±)-**16** (100 mg, 78%) as a pale brown oil.

Data for **16**

**<sup>1</sup>H NMR** (CDCl<sub>3</sub>, 400 MHz)  $\delta$  = 6.99 (s, 1H), 6.78 (s, 1H), 5.97 (q, J = 1.3 Hz, 2H), 4.86 (d, J = 15.6 Hz, 1H), 4.56 (d, J = 15.6 Hz, 1H), 4.23 (ddd, J = 8.8, 6.5, 3.8 Hz, 1H), 3.67 (t, J = 6.3 Hz, 1H), 2.63 (q, J = 7.2 Hz, 1H), 2.32 (qd, J = 16.4, 7.8 Hz, 2H), 1.93 – 1.37 (m, 6H).

**<sup>13</sup>C NMR** (CDCl<sub>3</sub>, 100 MHz)  $\delta$  = 175.7, 148.0, 147.8, 129.1, 113.8, 113.1, 109.9, 102.0, 63.7, 52.3, 45.7, 36.0, 34.0, 33.2, 26.5, 20.3.

**IR**  $\nu_{\text{max}}$  (film)/cm<sup>-1</sup> = 2931, 1689, 1502, 1478, 1407, 1235, 1190, 1110, 1036, 928, 729.

**HRMS** (ESI<sup>+</sup>) C<sub>16</sub>H<sub>17</sub>O<sub>3</sub>N<sup>79</sup>Br<sub>2</sub>Na requires 451.94674, found [M+Na]<sup>+</sup> 451.94707 ( $\Delta$  0.72 ppm).

**$[\alpha]_{\text{D}}^{25}$**  = -46.5 (c = 1.00, CHCl<sub>3</sub>).

**(3a*S*,7a*R*)-1-((6-Bromobenzo[d][1,3]dioxol-5-yl)methyl)-1,3,3a,4,5,7a-Hexahydro-2H-indol-2-one,**

**SI-3**

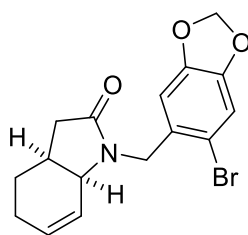

**SI-3**

### Enantioenriched

To a stirred solution of dibromide **16** (161 mg, 0.375 mmol, 1.0 equiv.) in THF (3 mL) at rt was added 1M KO*t*BU in THF (413  $\mu$ L, 0.413 mmol, 1.1 equiv.) and the reaction left to stir for 45 min. The reaction was then quenched by the addition of water (10 mL), extracted with Et<sub>2</sub>O (3  $\times$  5 mL). The combined organic extracts were washed with brine (5 mL) and concentrated *in vacuo* to give a crude residue. Purification by column chromatography (SiO<sub>2</sub>, eluent load, pentane:EtOAc, 50:50) gave the desired compound (–)-**SI-3** (131 mg, quant.) as a pale oil.

### Racemic

To a stirred solution of dibromide **16** (50 mg, 0.116 mmol, 1.0 equiv.) in THF (1 mL) at rt was added 1M KO*t*BU in THF (130  $\mu$ L, 0.130 mmol, 1.1 equiv.) and the reaction left to stir for 45 min. The reaction was then quenched by the addition of water (5 mL), extracted with Et<sub>2</sub>O (3  $\times$  5 mL). The combined organic extracts were washed with brine (5 mL) and concentrated *in vacuo* to give a crude residue. Purification by column chromatography (SiO<sub>2</sub>, eluent load, pentane:EtOAc, 50:50) gave the desired compound ( $\pm$ )-**SI-3** (40 mg, 99%) as a pale oil.

Data for **SI-3**

**<sup>1</sup>H NMR** (CDCl<sub>3</sub>, 400 MHz)  $\delta$  = 6.97 (s, 1H), 6.74 (s, 1H), 5.96 – 5.94 (m, 3H), 5.72 (ddt, J = 10.2, 3.6, 2.0 Hz, 1H), 4.75 (d, J = 15.6 Hz, 1H), 4.25 (d, J = 15.6 Hz, 1H), 3.85 (ddt, J = 5.1, 3.4, 1.8 Hz, 1H), 2.58 – 2.43 (m, 2H), 2.29 (td, J = 16.1, 15.5, 6.1 Hz, 1H), 2.15 – 1.88 (m, 2H), 1.76 – 1.51 (m, 2H).

**<sup>13</sup>C NMR** (CDCl<sub>3</sub>, 100 MHz)  $\delta$  = 174.6, 147.9, 132.0, 129.5, 123.4, 113.7, 112.8, 109.4, 102.0, 54.9, 44.1, 35.9, 31.2, 24.3, 22.4.

**IR**  $\nu_{\text{max}}$  (film)/cm<sup>-1</sup> = 2920, 2360, 1680, 1501, 1232, 1033, 729.

**HRMS** (ESI<sup>+</sup>) C<sub>16</sub>H<sub>17</sub>O<sub>3</sub>N<sup>79</sup>Br requires 350.0386 requires 270.1125, [M+H]<sup>+</sup> = 350.0388 ( $\Delta$  = +0.44 ppm).

**M.p.** = 120 – 122 °C.

**$[\alpha]_{\text{D}}^{25}$**  = -1.4 (c = 1.00, CHCl<sub>3</sub>).

Data was consistent with that previously reported.<sup>10</sup>

**(3a*S*,3a<sup>1</sup>*R*,12b*R*)-3a,4,7,12b-Tetrahydro-3H-[1,3]dioxolo[4,5-*j*]pyrrolo[3,2,1-*de*]phenanthridin-5(3a1H)-one, 17**

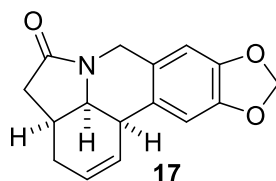

**Enantioenriched**

A stirred solution of bromo alkene (–)-**SI-3** (105 mg, 0.3 mmol, 1.0 equiv.) in DMF (9 mL) at rt was sparged with N<sub>2</sub> for 1 h. This was followed by the sequential addition of PPh<sub>3</sub> (31 mg, 0.12 mmol, 40 mol%), Pd(OAc)<sub>2</sub> (13 mg, 0.06 mmol, 20 mol%), and *i*-PrNEt (183 μL, 0.6 mmol, 2.0 equiv.) and the reaction was heated to 155 °C for 20 h. The reaction was then quenched by the addition of water (10 mL), extracted with Et<sub>2</sub>O (3 × 5 mL). The combined organic extracts were washed with brine (3 × 5 mL) and concentrated *in vacuo* to give a crude residue. Purification by column chromatography (SiO<sub>2</sub>, eluent load, pentane:EtOAc, 20:80) gave the desired compound (+)-**17** (49 mg, 60%) as a pale oil.

**Racemic**

A stirred solution of bromo alkene (±)-**SI-3** (140 mg, 0.4 mmol, 1.0 equiv.) in DMF (11 mL) at rt was sparged with N<sub>2</sub> for 1 h. This was followed by the sequential addition of PPh<sub>3</sub> (42 mg, 0.16 mmol, 40 mol%), Pd(OAc)<sub>2</sub> (18 mg, 0.08 mmol, 20 mol%), and *i*-PrNEt (244 μL, 0.8 mmol, 2.0 equiv.) and the reaction was heated to 155 °C for 16 h. The reaction was then quenched by the addition of water (10 mL), extracted with Et<sub>2</sub>O (3 × 5 mL). The combined organic extracts were washed with brine (3 × 5 mL) and concentrated *in vacuo* to give a crude residue. Purification by column chromatography (SiO<sub>2</sub>, eluent load, pentane:EtOAc, 20:80) gave the desired compound (±)-**17** (69 mg, 64%) as a pale oil.

Data for **17**:

**<sup>1</sup>H NMR** (CDCl<sub>3</sub>, 400 MHz)  $\delta$  = 6.66 (s, 1H), 6.57 (s, 1H), 5.95 – 5.91 (m, 2H), 5.88 (ddt, J = 9.5, 6.5, 3.5 Hz, 1H), 5.64 (dtd, J = 9.5, 2.6, 1.3 Hz, 1H), 4.78 (d, J = 17.1 Hz, 1H), 4.11 (d, J = 17.1 Hz, 1H), 4.05 (dd, J = 8.1, 5.2 Hz, 1H), 3.28 (d, J = 2.6 Hz, 1H), 2.92 – 2.82 (m, 1H), 2.66 (ddd, J = 17.0, 9.6, 1.5 Hz), 2.19 (dddt, J = 16.1, 6.3, 3.8, 2.5 Hz, 1H), 2.14 – 2.07 (m, 2H).

**<sup>13</sup>C NMR** (CDCl<sub>3</sub>, 100 MHz)  $\delta$  = 174.4, 147.0, 146.9, 132.7, 129.8, 126.9, 124.4, 108.9, 106.2, 101.2, 56.7, 42.2, 38.9, 38.6, 29.2, 27.4.

**IR**  $\nu_{\text{max}}$  (film)/cm<sup>-1</sup> = 1674, 1483, 1035, 721, 694.

**HRMS** (ESI<sup>+</sup>) C<sub>16</sub>H<sub>16</sub>O<sub>3</sub>N requires 270.1125, found [M+H]<sup>+</sup> = 270.1124 ( $\Delta$  = -0.16 ppm).

**M.p.** = 120 – 122 °C.

**$[\alpha]_{\text{D}}^{25}$**  = +68.8 (c = 1.00, CHCl<sub>3</sub>).

Data was consistent with that previously reported.<sup>11</sup>

**(3a*S*,3a1*R*,12b*R*)-2,3,3a,4,7,12b-Hexahydro-1H-[1,3]dioxolo[4,5-*j*]pyrrolo[3,2,1-*de*]phenanthridin-5(3a1H)-one, SI-4**

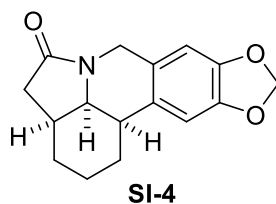

**Enantioenriched**

To a stirred solution of substrate (+)-**17** (48.9 mg, 0.182 mmol, 1.0 equiv.) in methanol (2.0 mL) was added 10% Pd/C (6.4 mg, 0.06 mmol, 0.3 equiv.) and hydrogen pressure was applied with a balloon for 16 h. The reaction mixture was filtered through Celite® using MeOH and the filtrate concentrated *in vacuo*, yielding the title compound (–)-**SI-4** (49.0 mg, 0.181 mmol, 99%) as colourless crystals.

**Racemic**

To a stirred solution of substrate (±)-**17** (68.8 mg, 0.256 mmol, 1.0 equiv.) in methanol (2.5 mL) was added 10% Pd/C (8.5 mg, 0.08 mmol, 0.3 equiv.) and hydrogen pressure was applied with a balloon for 16 h. The reaction mixture was filtered through Celite® using MeOH and the filtrate concentrated *in vacuo*, yielding the title compound (±)-**SI-4** (63.5 mg, 0.234 mmol, 92%) as colourless crystals.

Data for **SI-4**:

**<sup>1</sup>H NMR** (CDCl<sub>3</sub>, 400 MHz)  $\delta$  = 6.62 (s, 1H), 6.60 (s, 1H), 5.94 (d, J = 1.4 Hz, 1H), 5.92 (d, J = 1.4 Hz, 1H), 4.54 (d, J = 17.3 Hz, 1H), 4.33 (d, J = 17.3 Hz, 1H), 3.77 (t, J = 4.6 Hz, 1H), 2.75 (dt, J = 12.7, 4.4 Hz, 1H), 2.58 (dd, J = 16.1, 6.8 Hz, 1H), 2.49 – 2.37 (m, 1H), 2.09 (d, J = 16.1 Hz, 1H), 1.84 – 1.66 (m, 3H), 1.41 – 1.07 (m, 3H).

**<sup>13</sup>C NMR** (CDCl<sub>3</sub>, 100 MHz)  $\delta$  = 175.8, 146.9, 146.8, 131.8, 123.5, 108.6, 106.8, 101.2, 55.9, 42.8, 40.4, 40.0, 33.1, 30.4, 28.0, 23.8.

**IR**  $\nu_{\text{max}}$  (film)/cm<sup>-1</sup> = 2360, 1675, 1482, 1035, 932, 847.

**HRMS** (ESI<sup>+</sup>) C<sub>16</sub>H<sub>17</sub>O<sub>3</sub>NNa requires 294.1101, found [M+Na]<sup>+</sup> = 294.1100 ( $\Delta$  = -0.27 ppm).

**M.p.** = 122 – 124 °C.

**$[\alpha]_{\text{D}}^{25}$**  = -70.6 (c = 1.00, CHCl<sub>3</sub>).

Data was consistent with that previously reported.<sup>10</sup>



### (-)- $\gamma$ -Lycorane (**1**)

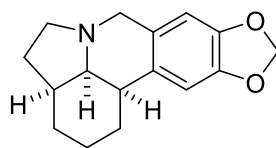

$\gamma$ -lycorane (**1**)

#### Enantioenriched

Substrate **SI-4** (34.0 mg, 0.125 mmol, 1.0 equiv.) was dissolved in THF (50 mL) and placed under a nitrogen atmosphere.  $\text{LiAlH}_4$  (19.1 mg, 0.502 mmol, 4.0 equiv.) was added portion-wise to the stirred solution at rt. The mixture was heated at reflux for 15 h, cooled to rt, and poured over sat. aq.  $\text{Na}_2\text{SO}_4$  (10 mL). The mixture was extracted with  $\text{CH}_2\text{Cl}_2$  (3 x 10 mL), filtered, concentrated *in vacuo*, yielding the crude product. Purification by column chromatography ( $\text{SiO}_2$ ; wet load; 94.5%  $\text{CH}_2\text{Cl}_2$ , 4% MeOH, 0.5%  $\text{NEt}_3$ ), gave (-)- $\gamma$ -lycorane (**1**) as a colourless solid (21.7 mg, 0.085 mmol, 68%, 99:1 er).

#### Racemic

Substrate **SI-4** (60.0 mg, 0.221 mmol, 1.0 equiv.) was dissolved in THF (10 mL) and placed under a nitrogen atmosphere.  $\text{LiAlH}_4$  (33.6 mg, 0.885 mmol, 4.0 equiv.) was added portionwise to the stirred solution at rt. The mixture was heated at reflux for 15 h, cooled to rt, and poured over sat. aq.  $\text{Na}_2\text{SO}_4$  (20 mL). The mixture was extracted with  $\text{CH}_2\text{Cl}_2$  (3 x 20 mL), filtered, concentrated *in vacuo*, yielding the crude product. Purification by column chromatography ( $\text{SiO}_2$ ; wet load; 94.5%  $\text{CH}_2\text{Cl}_2$ , 4% MeOH, 0.5%  $\text{Et}_3\text{N}$ ), gave ( $\pm$ )- $\gamma$ -lycorane (**1**) as a pale green solid (41.0 mg, 0.159 mmol, 72%).

Data for  $\gamma$ -lycorane (**1**):

$^1\text{H NMR}$  ( $\text{CDCl}_3$ , 400 MHz)  $\delta$  = 6.61 (s, 1H), 6.49 (s, 1H), 5.90 – 5.87 (m, 2H), 4.02 (d,  $J$  = 14.4 Hz, 1H), 3.39 (td,  $J$  = 9.2, 3.9 Hz, 1H), 3.22 (d,  $J$  = 14.3 Hz, 1H), 2.74 (dt,  $J$  = 12.1, 4.7 Hz, 1H), 2.38 (t,  $J$  = 5.0 Hz, 1H), 2.27 – 2.11 (m, 2H), 2.08-1.96 (m, 1H), 1.81 – 1.67 (m, 2H), 1.67 – 1.59 (m, 1H), 1.53 – 1.41 (m, 2H), 1.36 – 1.25 (m, 2H).

$^{13}\text{C NMR}$  ( $\text{CDCl}_3$ , 100 MHz)  $\delta$  = 146.2, 145.8, 133.3, 127.4, 108.5, 106.4, 100.8, 63.1, 57.3, 53.9, 39.6, 37.5, 31.8, 30.5, 29.4, 25.3.

$\text{IR } \nu_{\text{max}}$  (film)/ $\text{cm}^{-1}$  = 2921, 1504, 1229, 1039, 867, 851.

$\text{HRMS}$  ( $\text{ESI}^+$ )  $\text{C}_{16}\text{H}_{20}\text{O}_2\text{N}$  requires 258.1489, found  $[\text{M}+\text{H}]^+$  = 258.1490 ( $\Delta$  = +0.63 ppm).

$\text{M.p.}$  = 100 – 102  $^\circ\text{C}$ .

$[\alpha]_{\text{D}}^{25}$  = -39.3 ( $c$  = 1.00,  $\text{CHCl}_3$ ).

$\text{Chiral HPLC}$  (Chiralpak IB with guard, 0.5 % IPA, 99.5 % hexane, 1.0 mL/min, 25  $^\circ\text{C}$ ,  $\lambda$  = 230 nm, 10  $\mu\text{L}$  injection,  $t_{\text{r}}$ (major) = 14.6 min,  $t_{\text{r}}$ (minor) = 9.8 min).

Data was consistent with that previously reported.<sup>10</sup>

### 3. NMR Comparison Tables

Table SI-1: <sup>1</sup>H NMR Comparison Table for Lycorane (**1**). Coupling constants in parentheses, in Hz.

| This Work (2022)<br>(CDCl <sub>3</sub> , 400 MHz) | Hilton (2017) <sup>12</sup><br>(CDCl <sub>3</sub> , 400 MHz) | Baudin (2018) <sup>13</sup><br>(CDCl <sub>3</sub> , 400 MHz) |
|---------------------------------------------------|--------------------------------------------------------------|--------------------------------------------------------------|
| 6.61 s                                            | 6.61 s                                                       | 6.61 s                                                       |
| 6.49 s                                            | 6.49 s                                                       | 6.49 s                                                       |
| 5.90-5.87 m                                       | 5.89 d (1.3);<br>5.88 d (1.3)                                | 5.90-5.86 m                                                  |
| 4.02 d (14.4)                                     | 4.02 d (14.3)                                                | 4.01 d (14.4)                                                |
| 3.39 td (9.2, 3.9)                                | 3.38 td (9.2, 3.9)                                           | 3.38 td (9.2, 3.9)                                           |
| 3.22 d (14.3)                                     | 3.21 d (14.3)                                                | 3.21 d (9.2, 3.9)                                            |
| 2.74 dt (12.1, 4.7)                               | 2.74 dt (9.2, 3.9)                                           | 2.74 dt (12.0, 4.7)                                          |
| 2.38 t (5.0)                                      | 2.38 t (4.7)                                                 | 2.38 t (4.8)                                                 |
| 2.27-2.11 m                                       | 2.18 m                                                       | 2.24-2.11 m                                                  |
| 2.08-1.96 m                                       | 2.08-1.99 m                                                  | 2.02 dddd (12.3, 10.9, 8.2,<br>3.9)                          |
| 1.81-1.67 m                                       | 1.78-1.67 m                                                  | 1.81-1.67 m                                                  |
| 1.67-1.60 m                                       | 1.66-1.60 m                                                  | 1.67-1.60 m                                                  |
| 1.53-1.41 m                                       | 1.53-1.42 m                                                  | 1.53-1.42 m                                                  |
| 1.36-1.25 m                                       | 1.39-1.29 m                                                  | 1.37-1.25 m                                                  |

Table SI-2:  $^{13}\text{C}$  NMR Comparison Table for  $\gamma$ -Lycorane (**1**).

| This Work (2022)<br>( $\text{CDCl}_3$ , 100 MHz) | Hilton (2017) <sup>12</sup><br>( $\text{CDCl}_3$ , 100 MHz) |          | Baudin (2018) <sup>13</sup><br>( $\text{CDCl}_3$ , 100 MHz) |          |
|--------------------------------------------------|-------------------------------------------------------------|----------|-------------------------------------------------------------|----------|
|                                                  | $\delta$                                                    | $\delta$ | $\Delta\delta_{\text{C}}$                                   | $\delta$ |
| 146.2                                            | 146.1                                                       | -0.1     | 146.2                                                       | 0        |
| 145.8                                            | 145.7                                                       | -0.1     | 145.8                                                       | 0        |
| 133.3                                            | 133.2                                                       | -0.1     | 133.3                                                       | 0        |
| 127.4                                            | 129.3                                                       | -0.1     | 127.4                                                       | 0        |
| 108.5                                            | 108.3                                                       | -0.2     | 108.5                                                       | 0        |
| 106.4                                            | 106.3                                                       | -0.1     | 106.4                                                       | 0        |
| 100.8                                            | 100.7                                                       | -0.1     | 100.8                                                       | 0        |
| 63.1                                             | 62.9                                                        | -0.2     | 63.1                                                        | 0        |
| 57.3                                             | 57.1                                                        | -0.2     | 57.3                                                        | 0        |
| 53.9                                             | 53.7                                                        | -0.2     | 53.9                                                        | 0        |
| 39.6                                             | 39.5                                                        | -0.1     | 39.6                                                        | 0        |
| 37.5                                             | 37.4                                                        | -0.1     | 37.5                                                        | 0        |
| 31.8                                             | 31.7                                                        | -0.1     | 31.9                                                        | +0.1     |
| 30.5                                             | 30.4                                                        | -0.1     | 30.6                                                        | +0.1     |
| 29.4                                             | 29.3                                                        | -0.1     | 29.4                                                        | 0        |
| 25.3                                             | 25.2                                                        | -0.1     | 25.4                                                        | +0.1     |

## 4. NMR Spectra

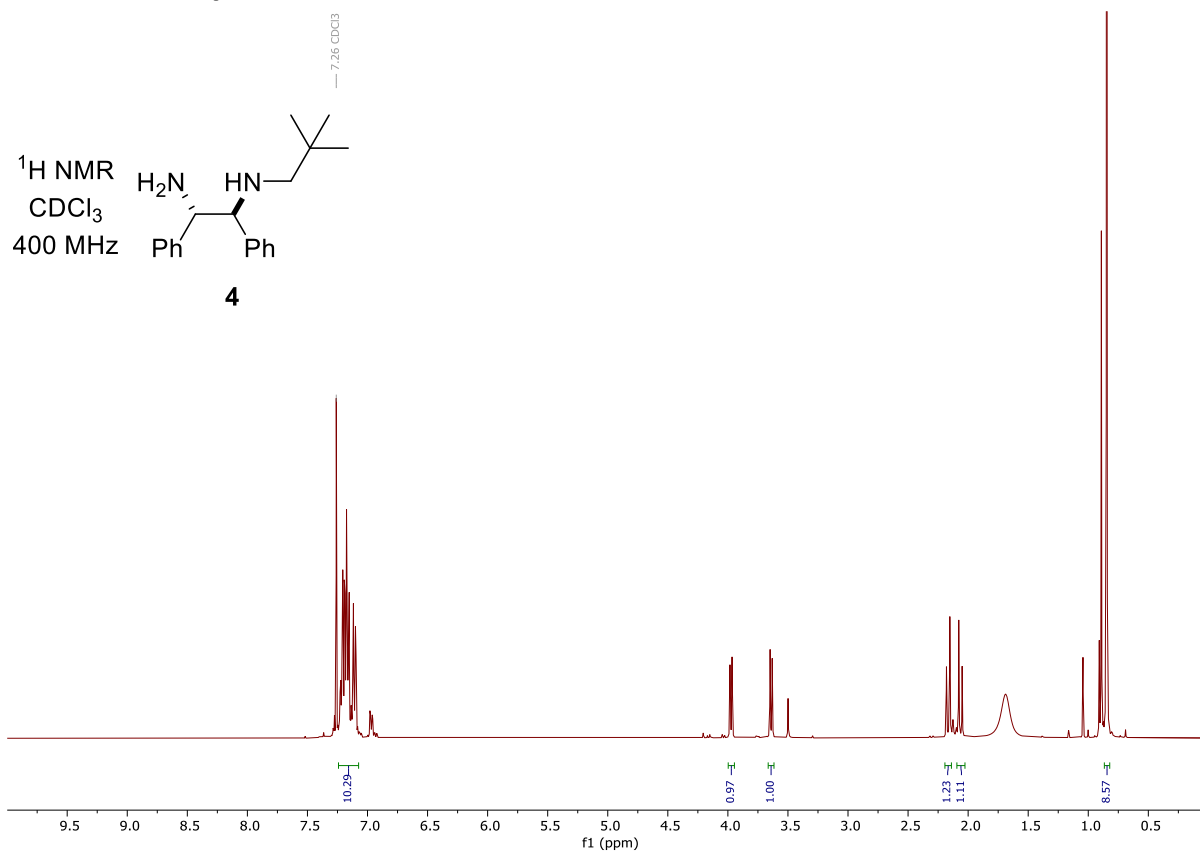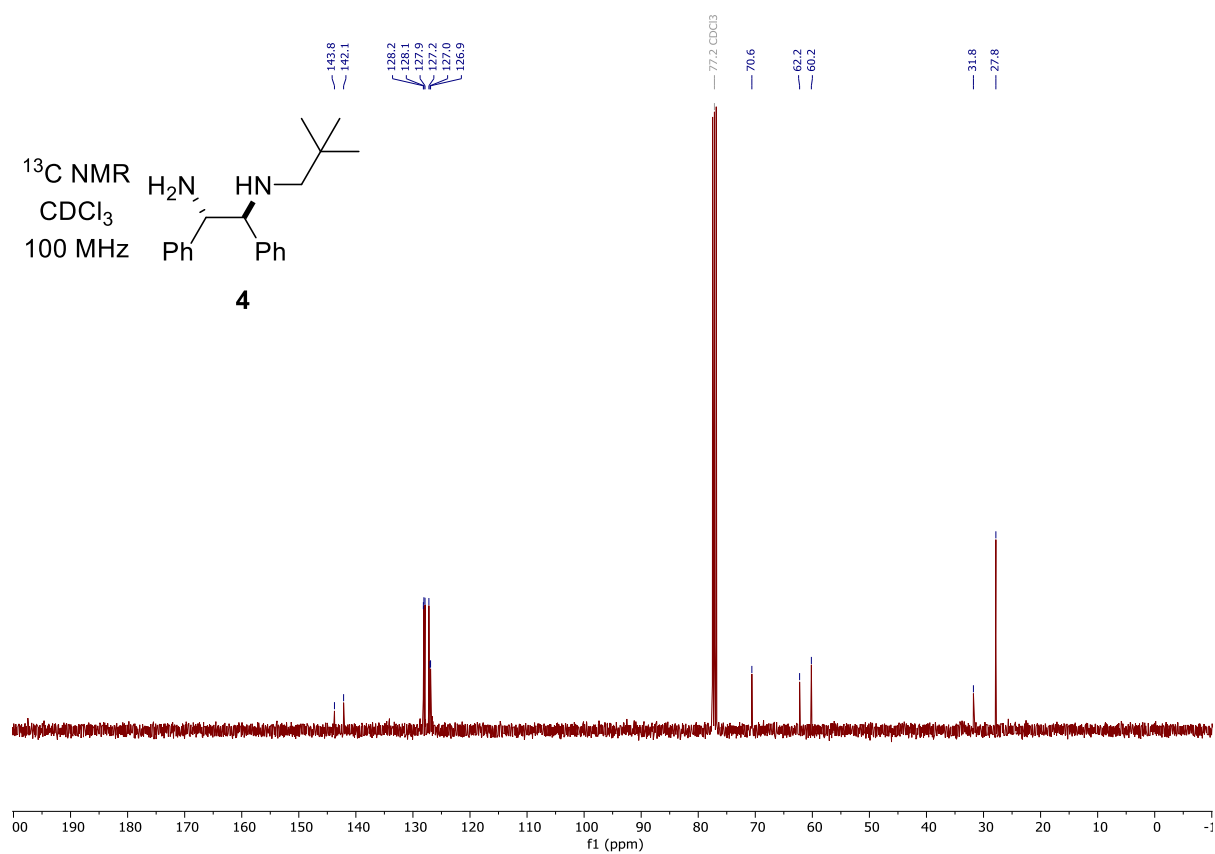

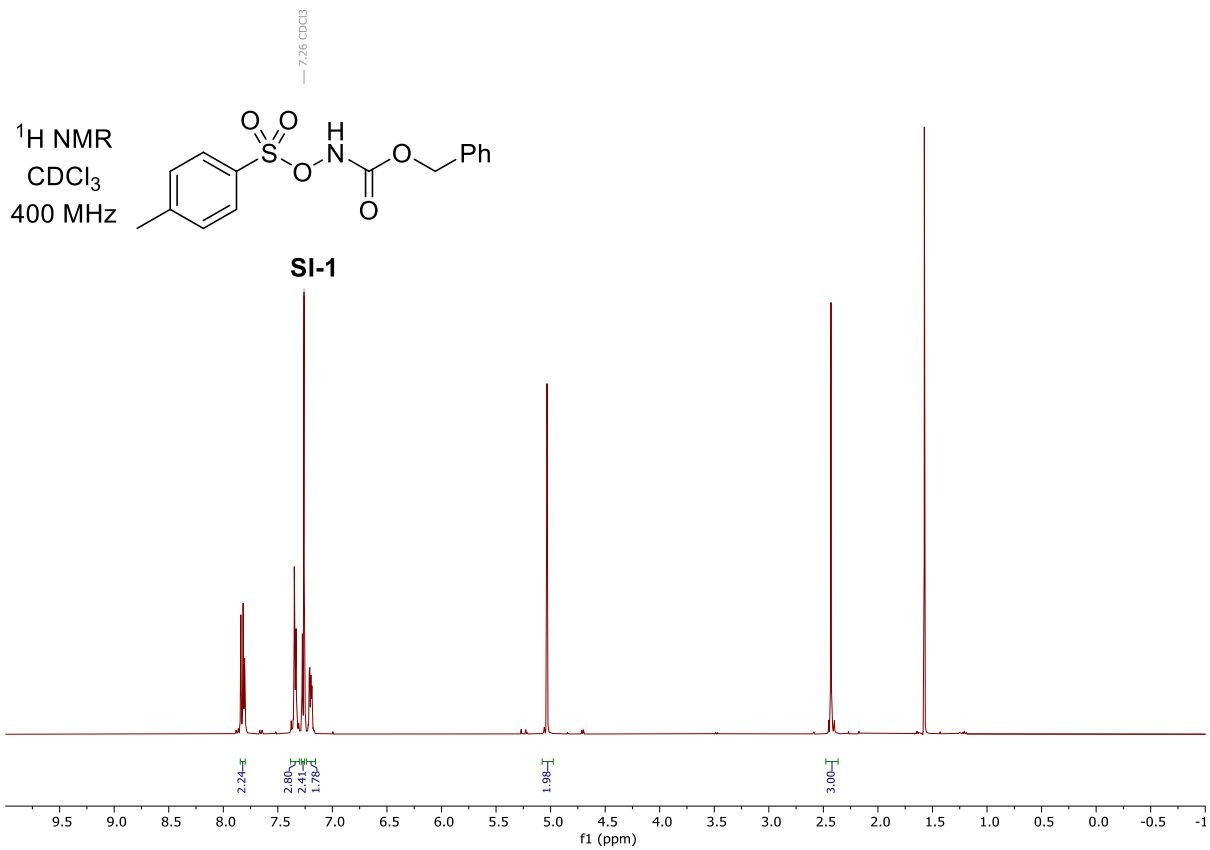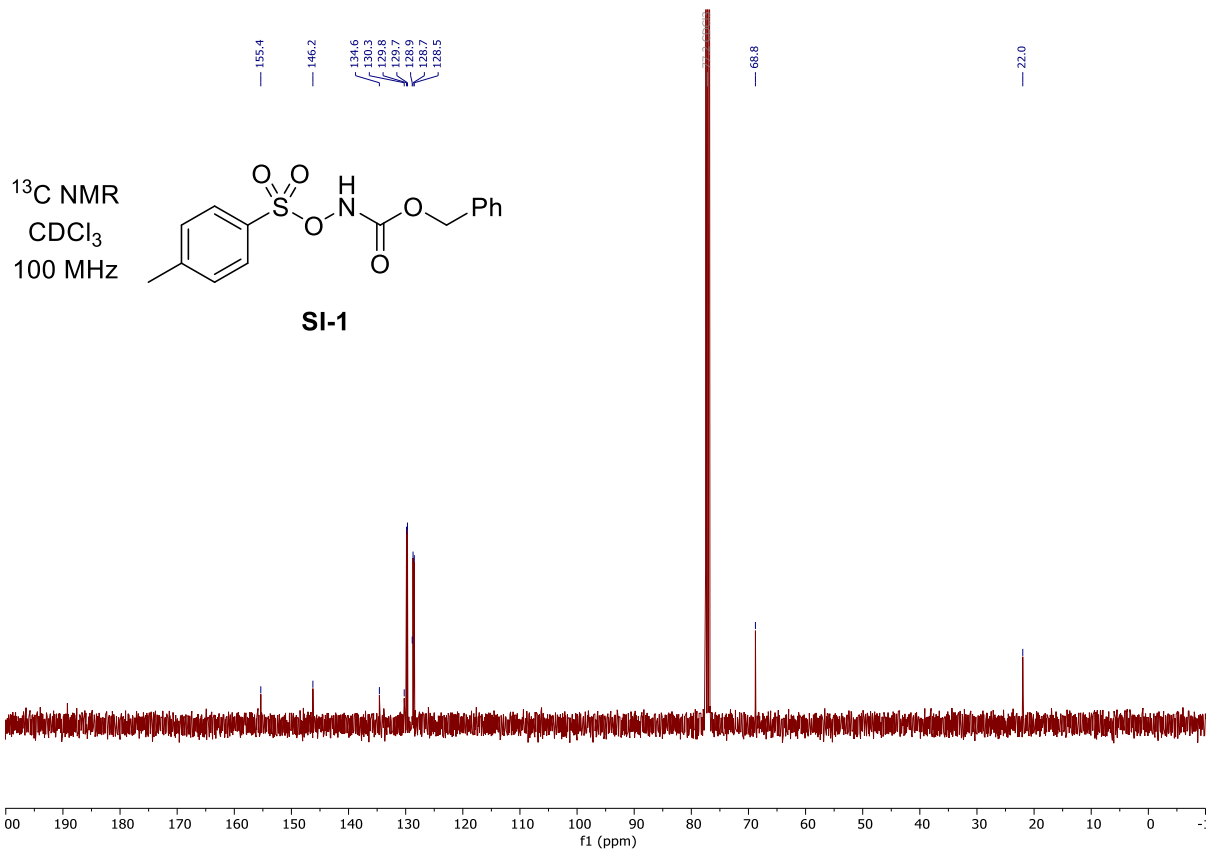

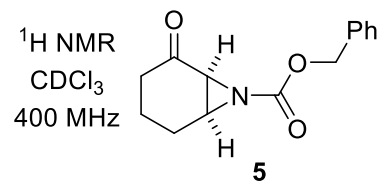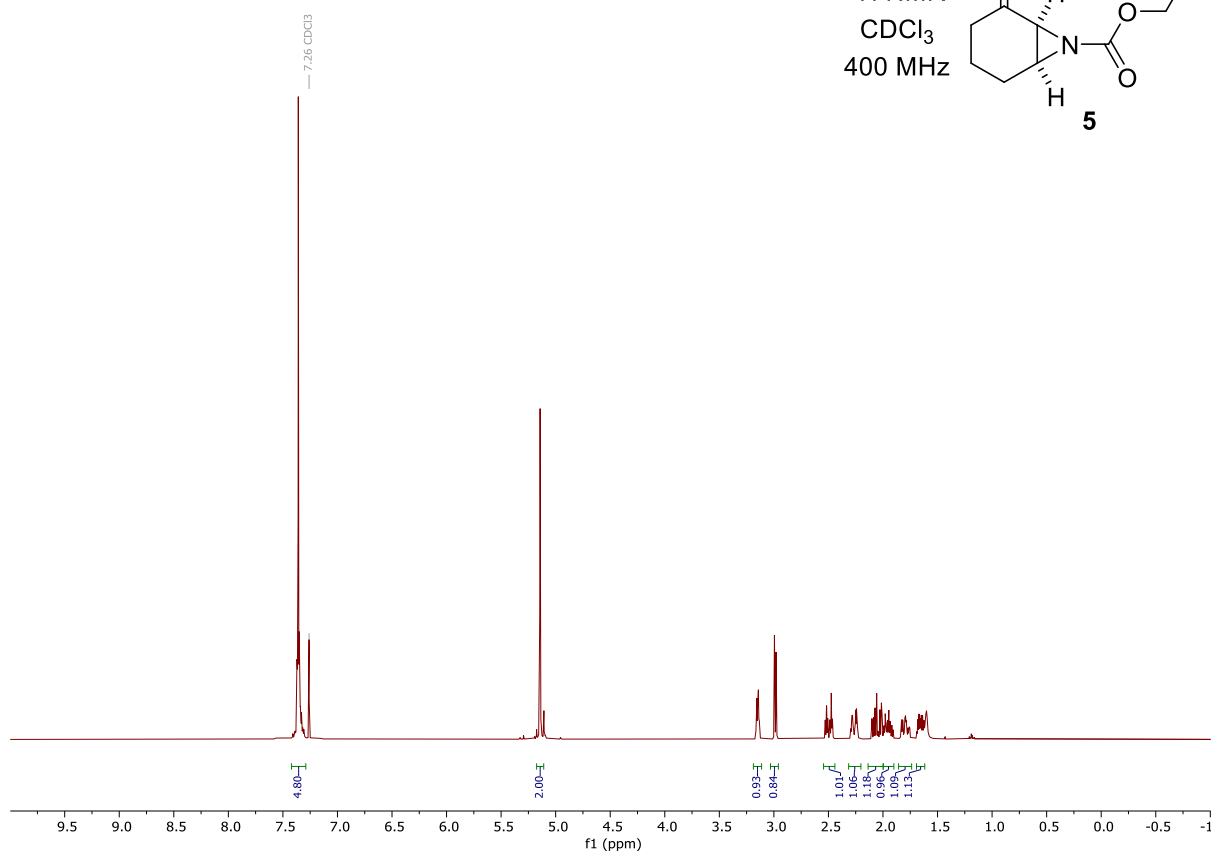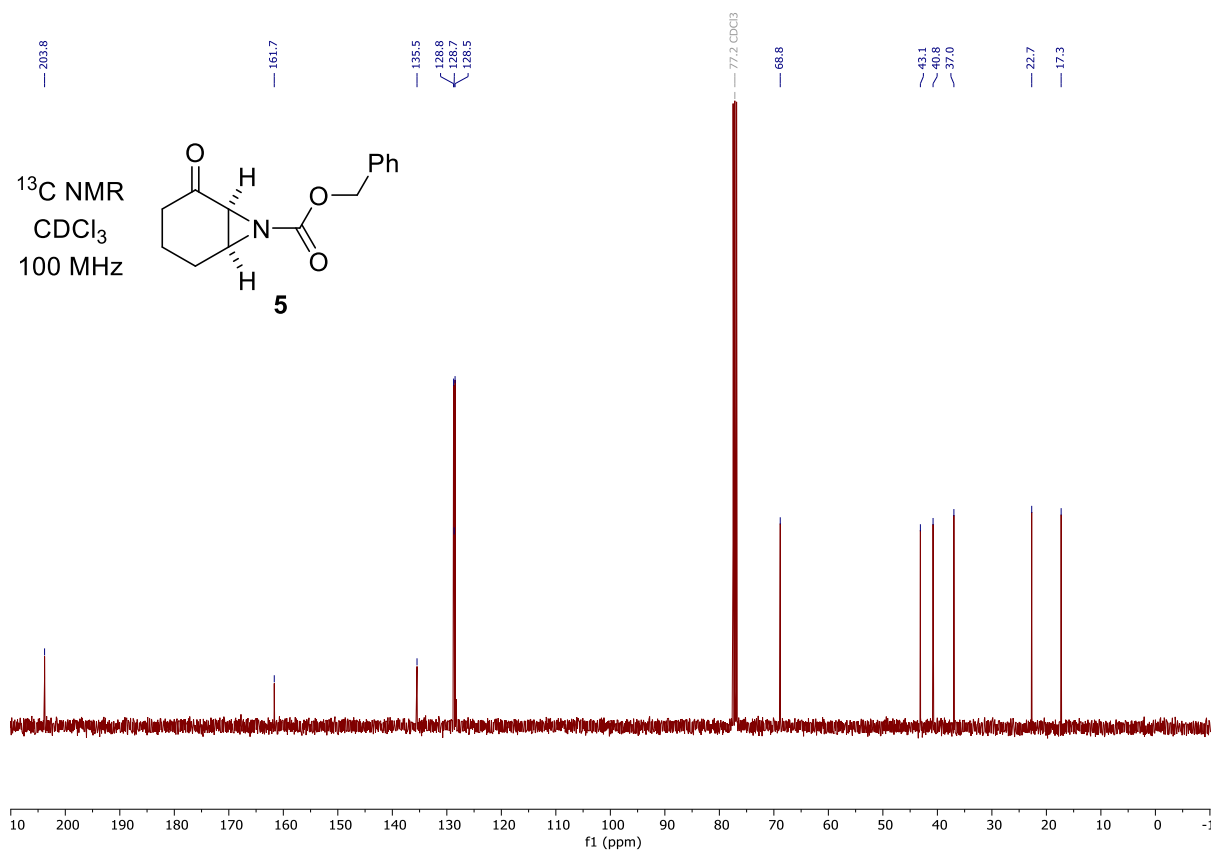

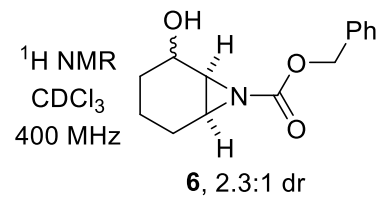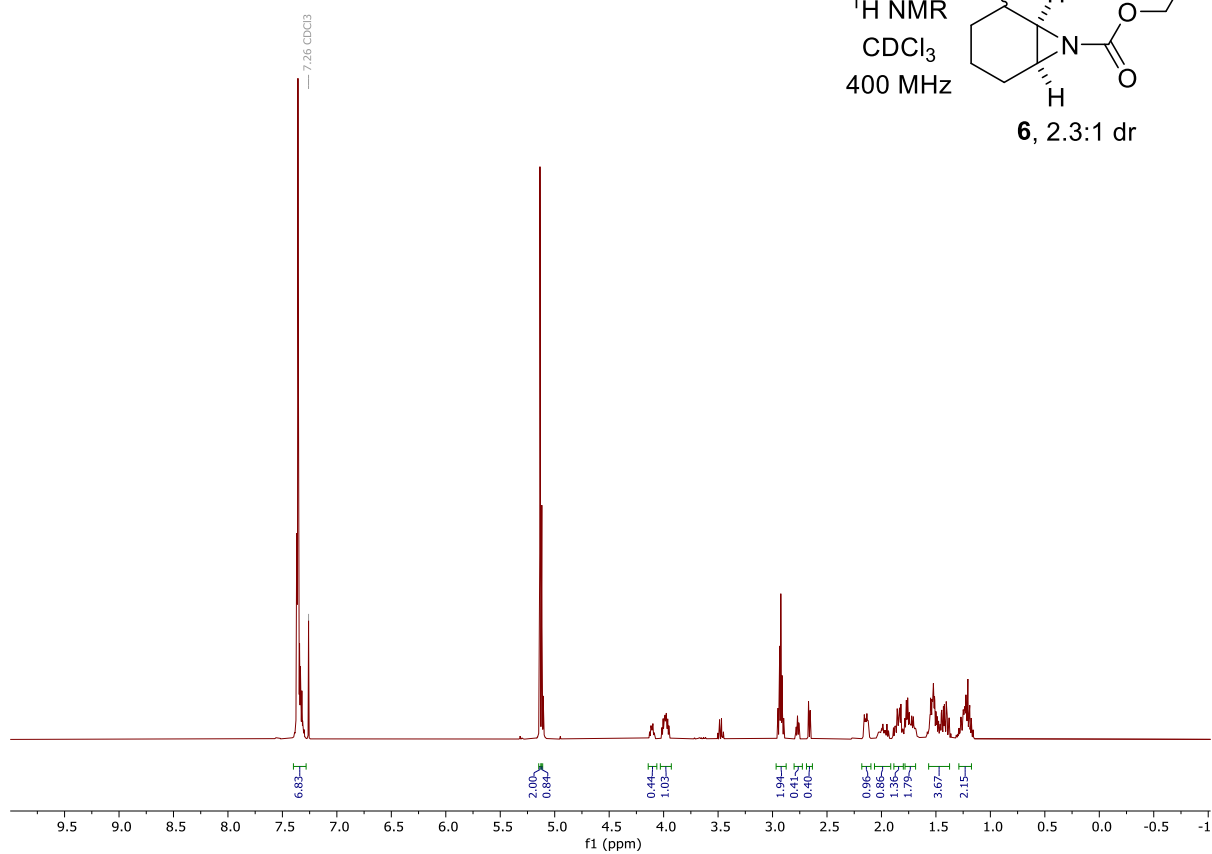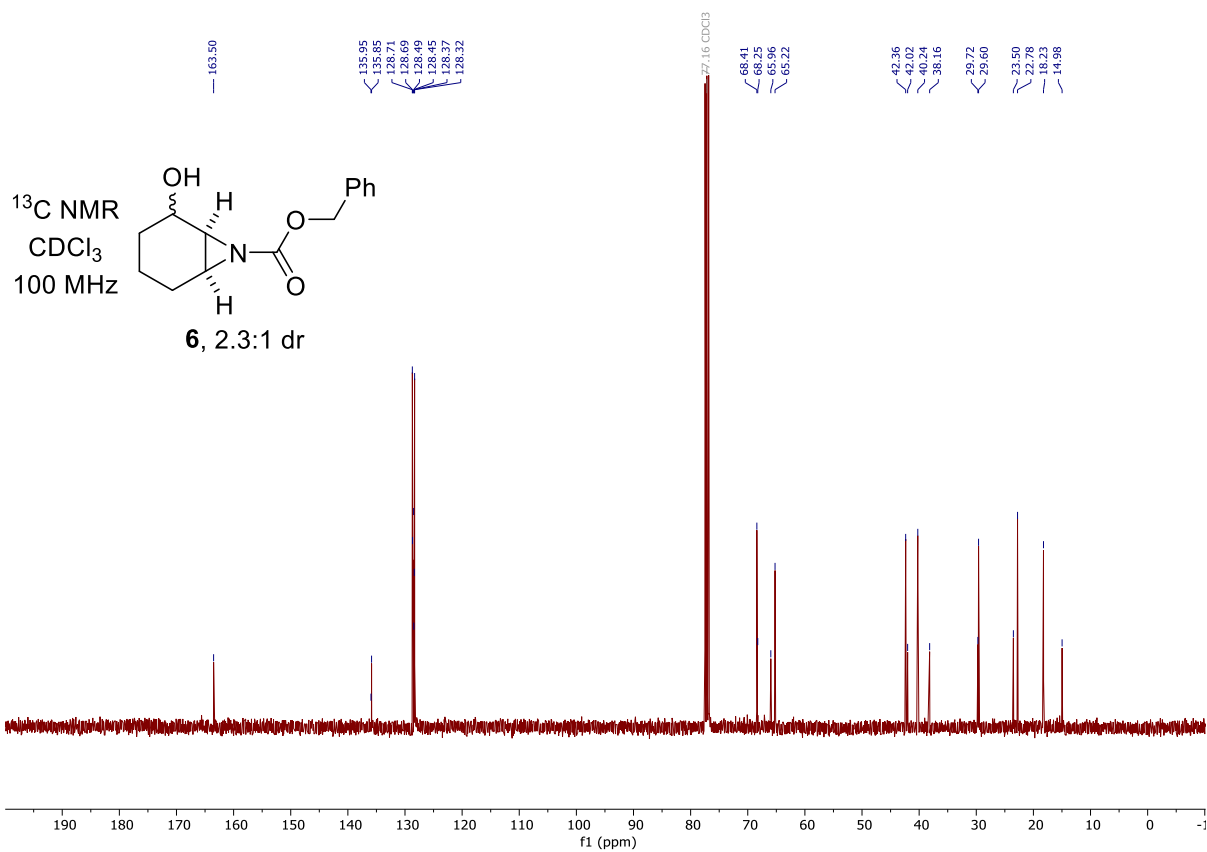



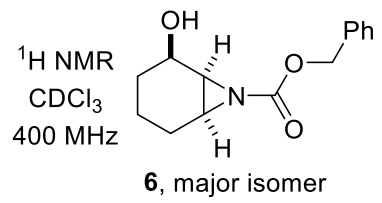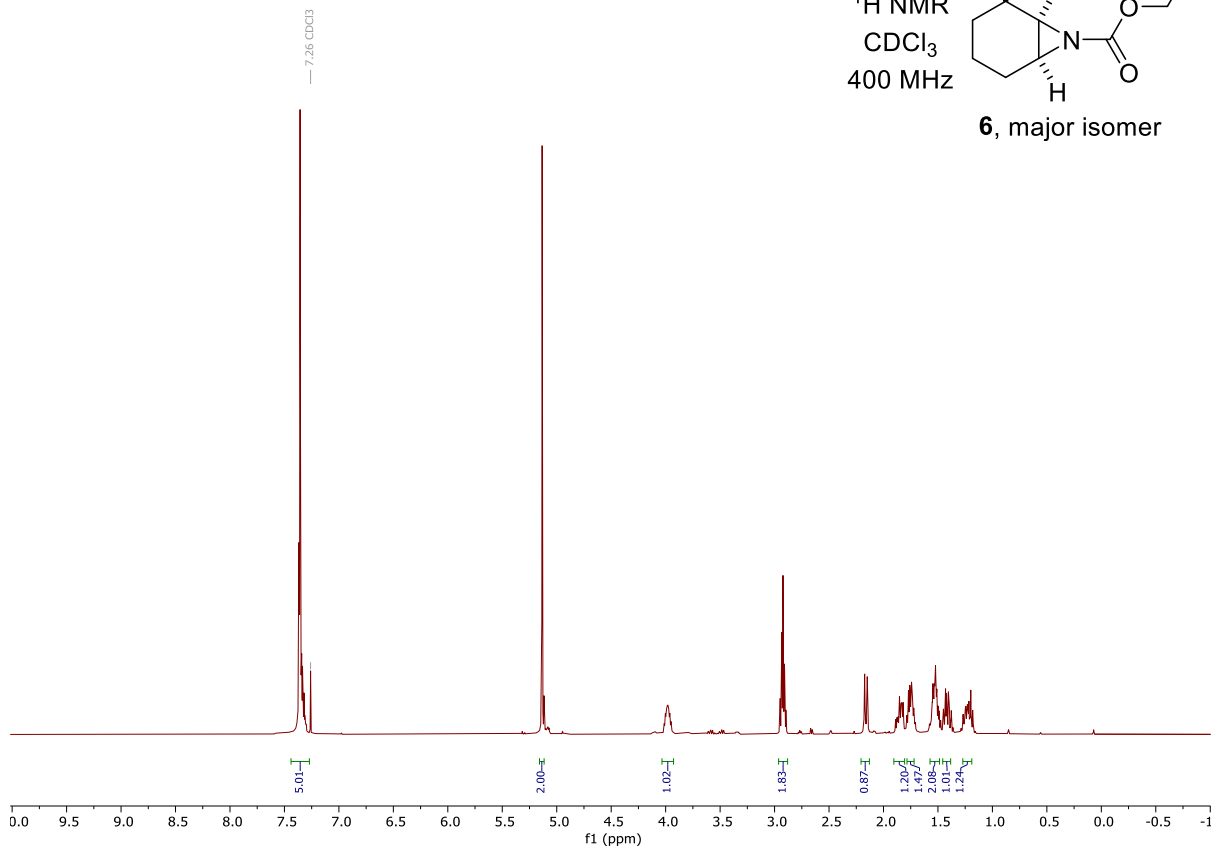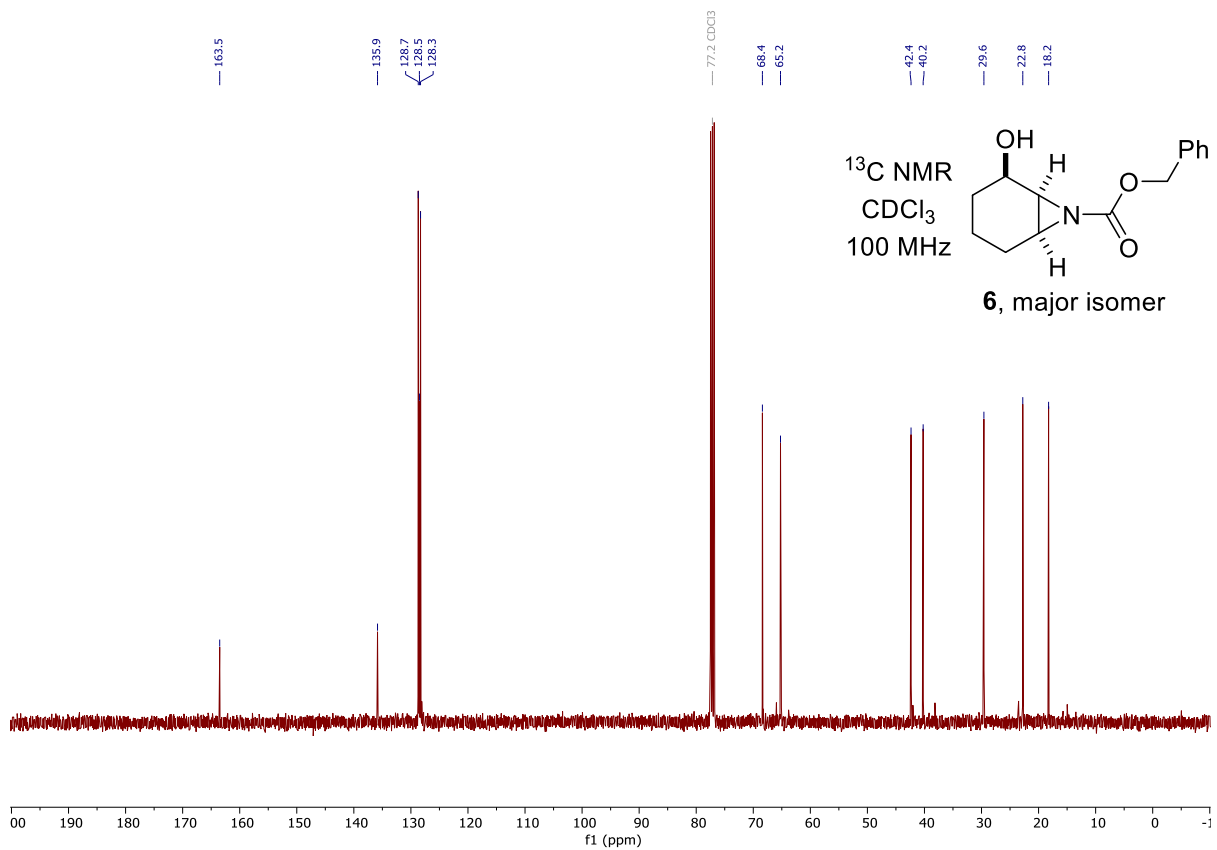

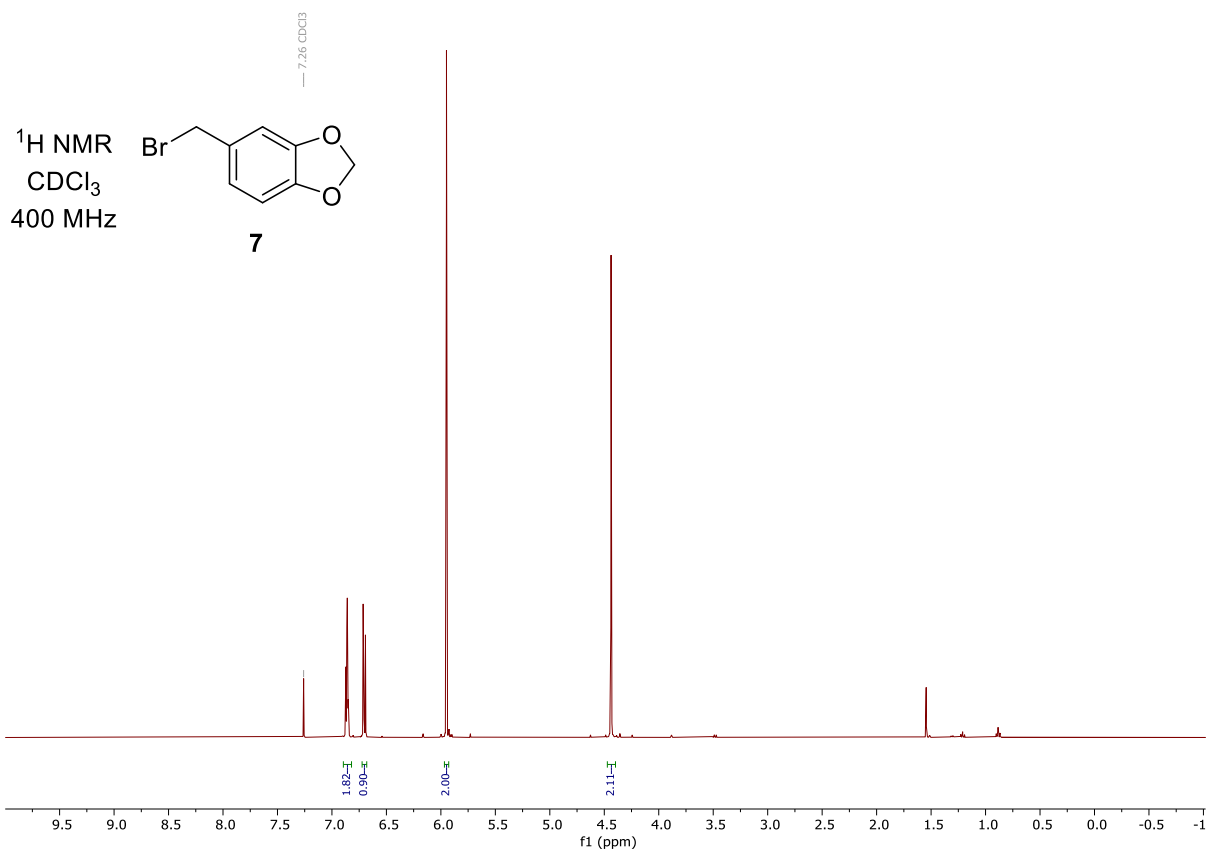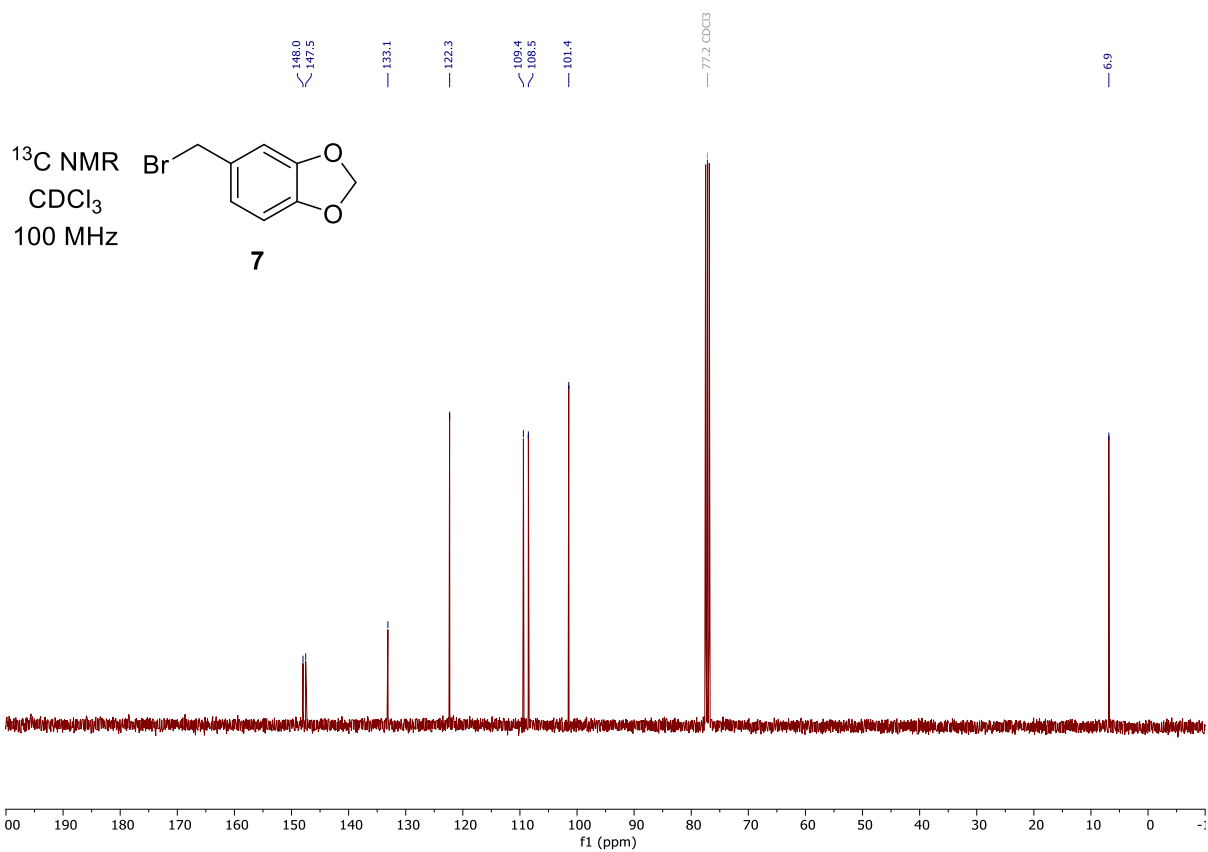

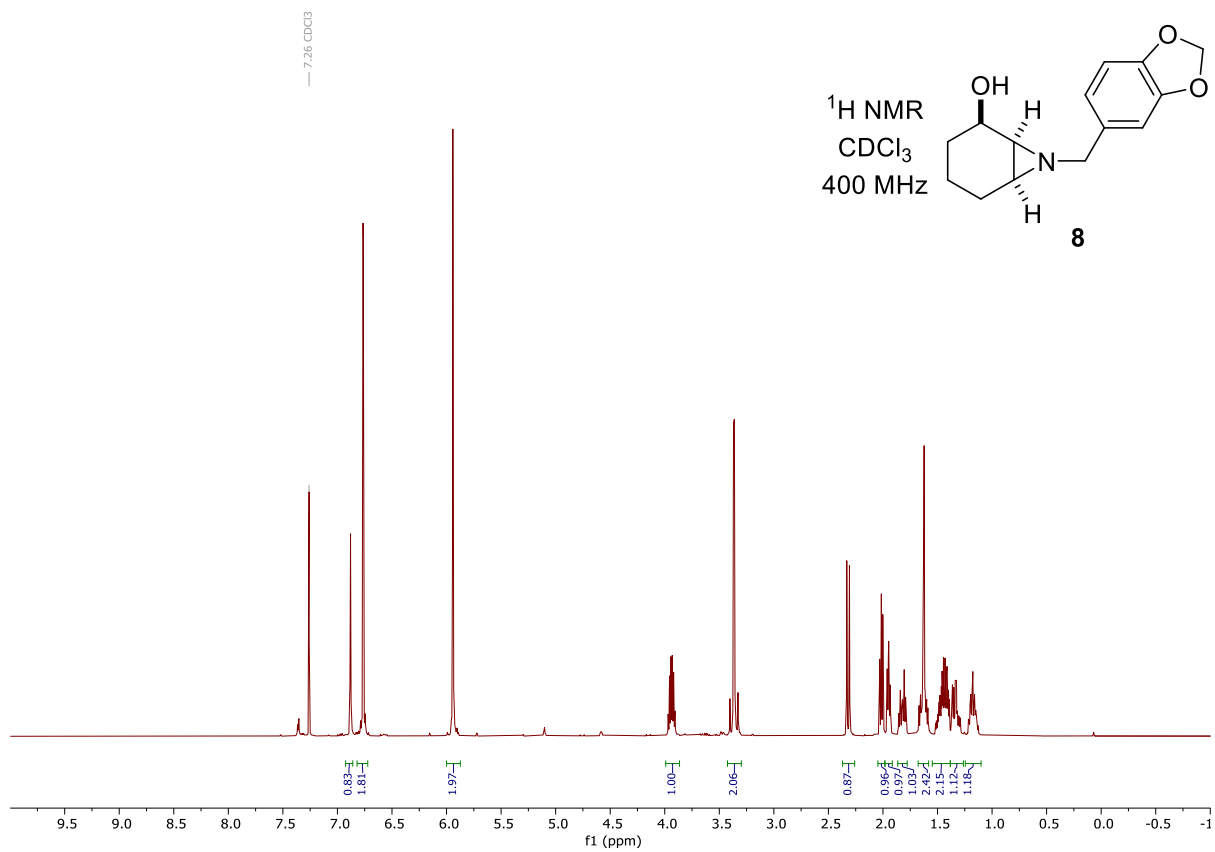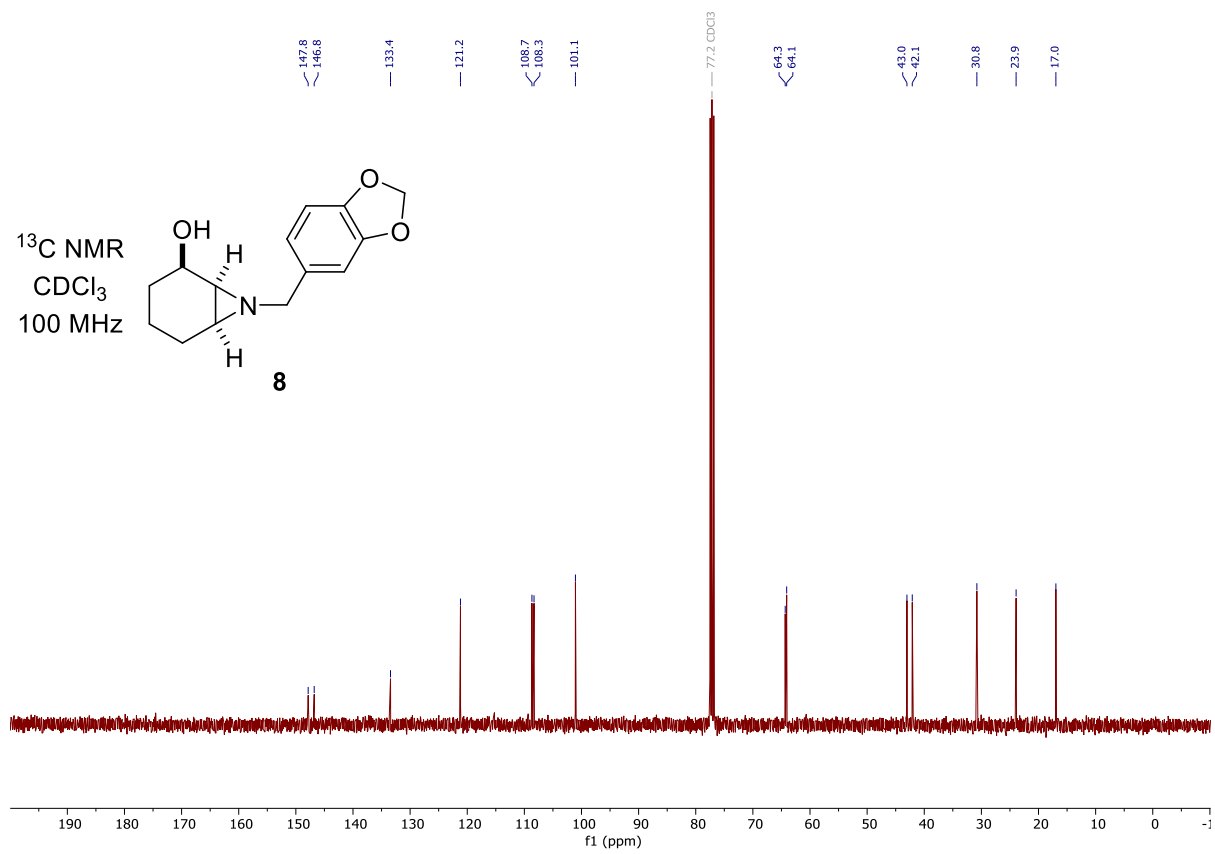

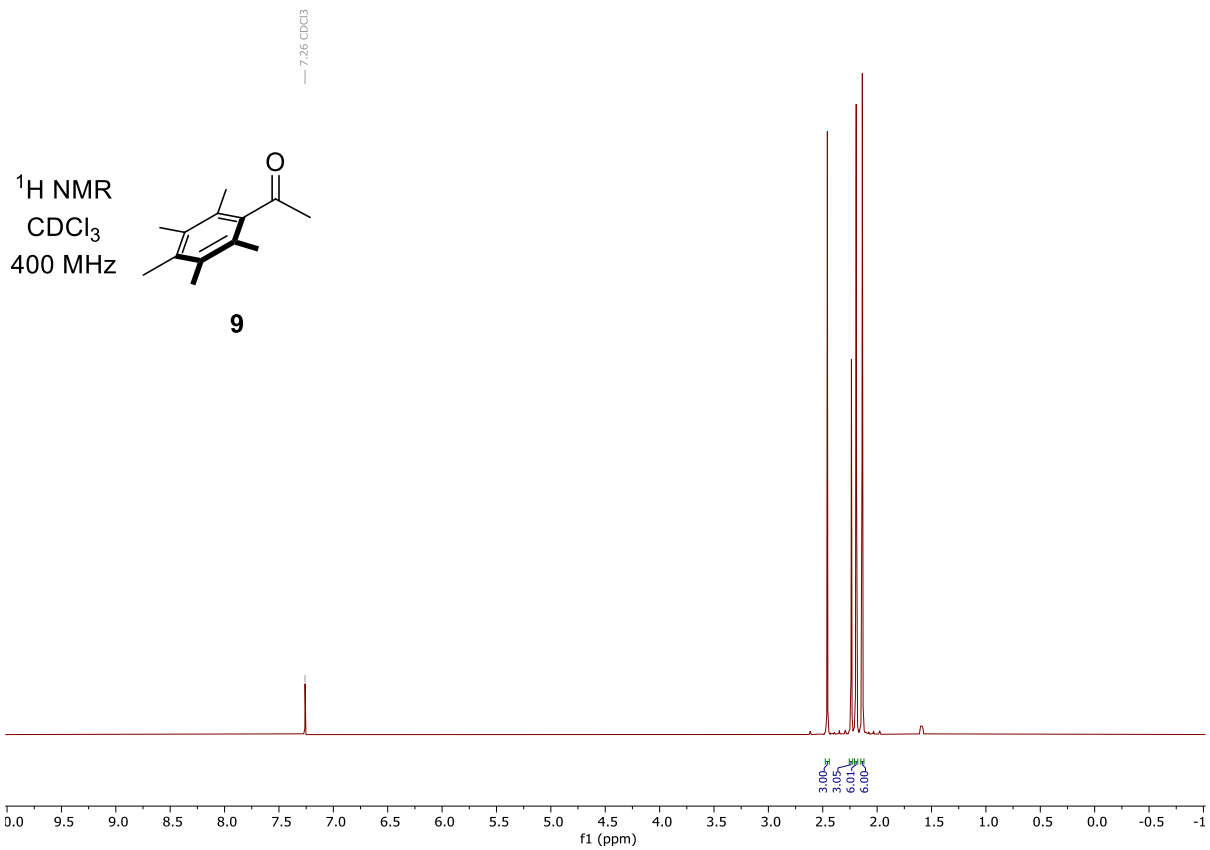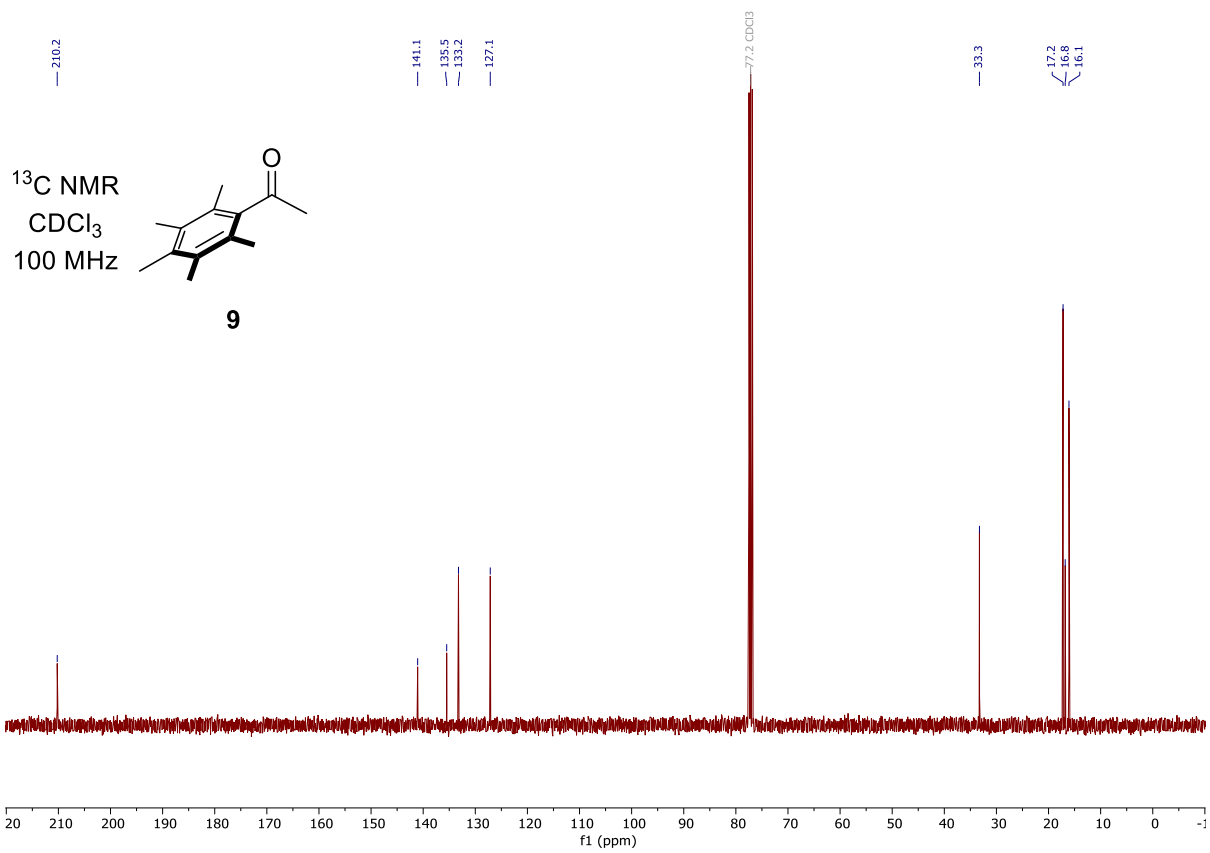

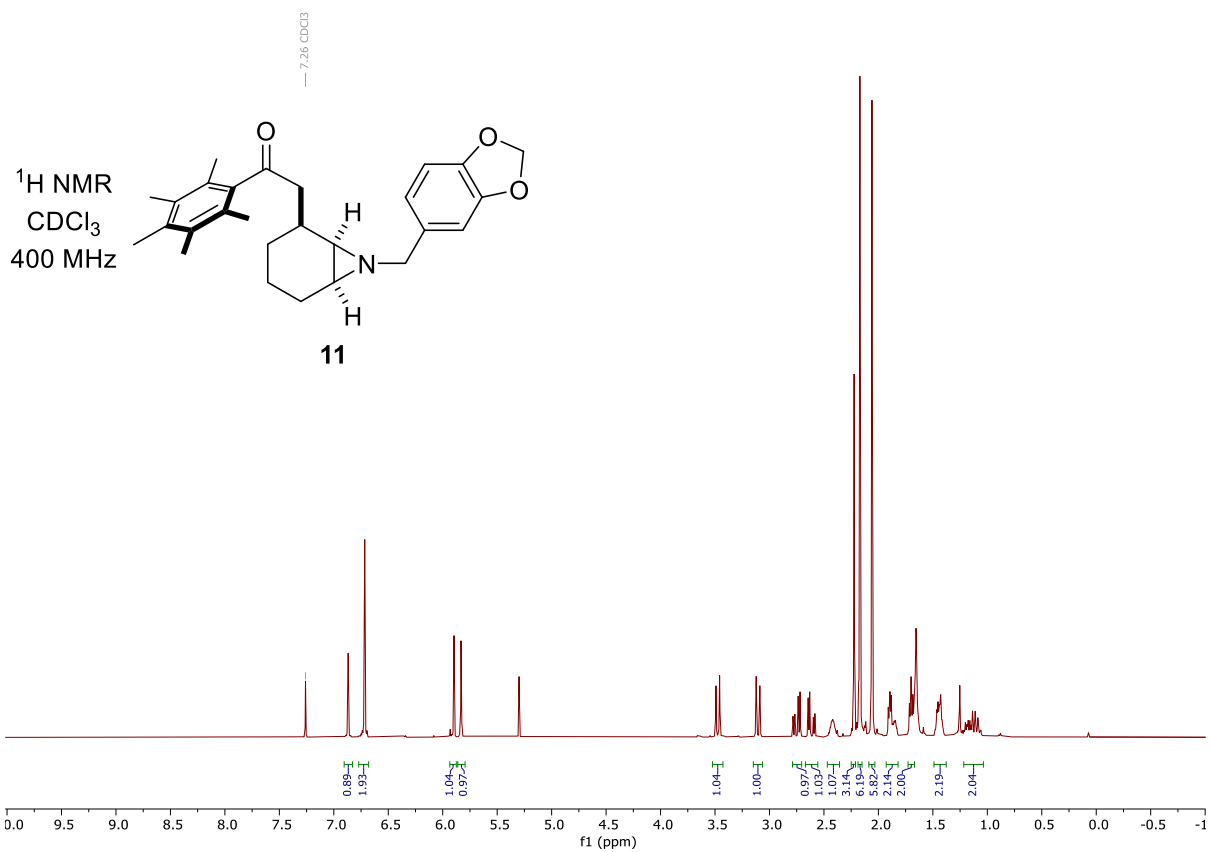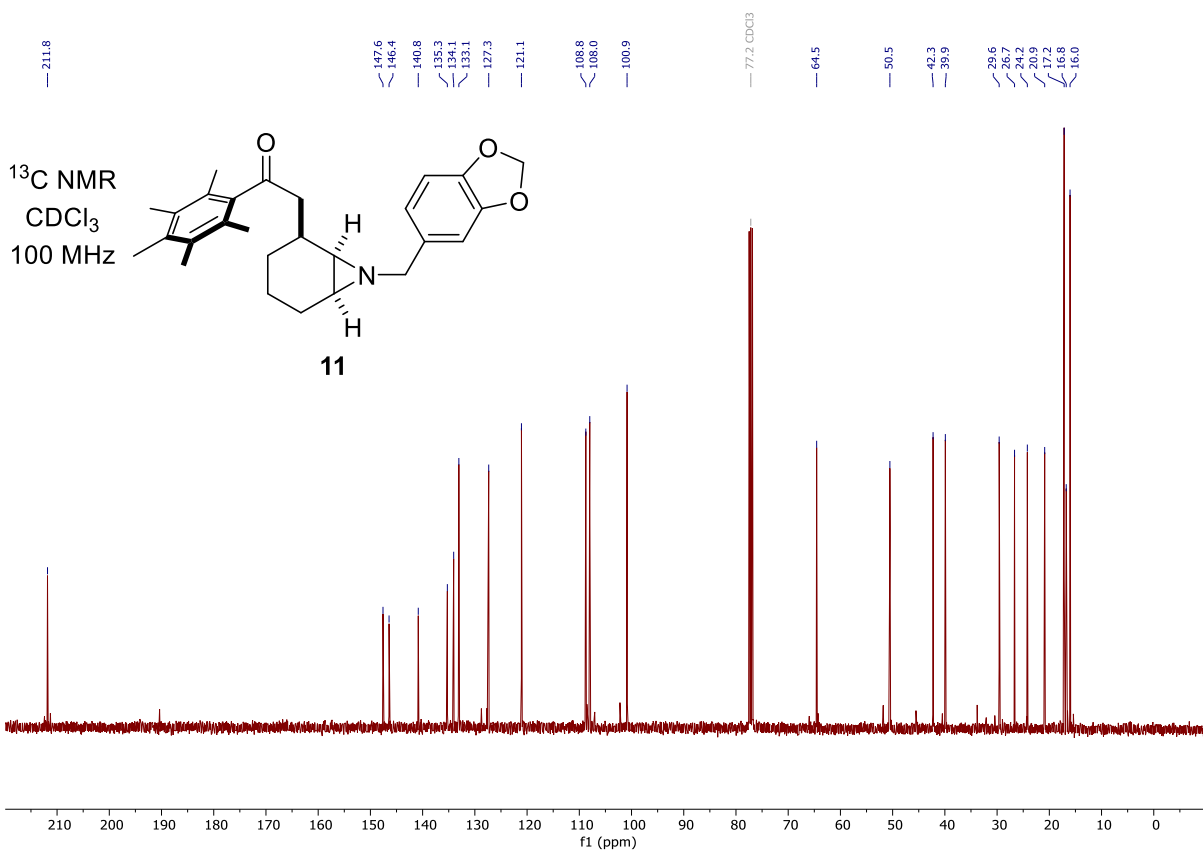

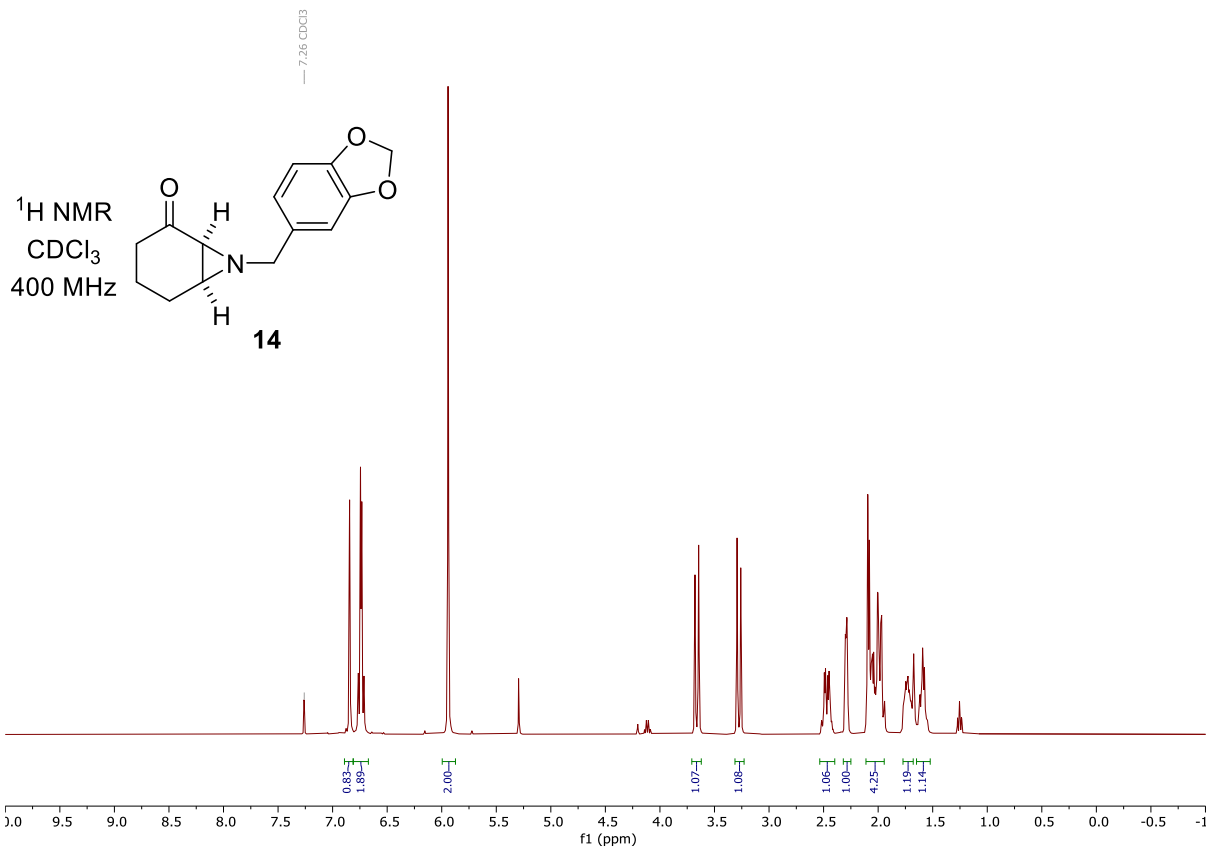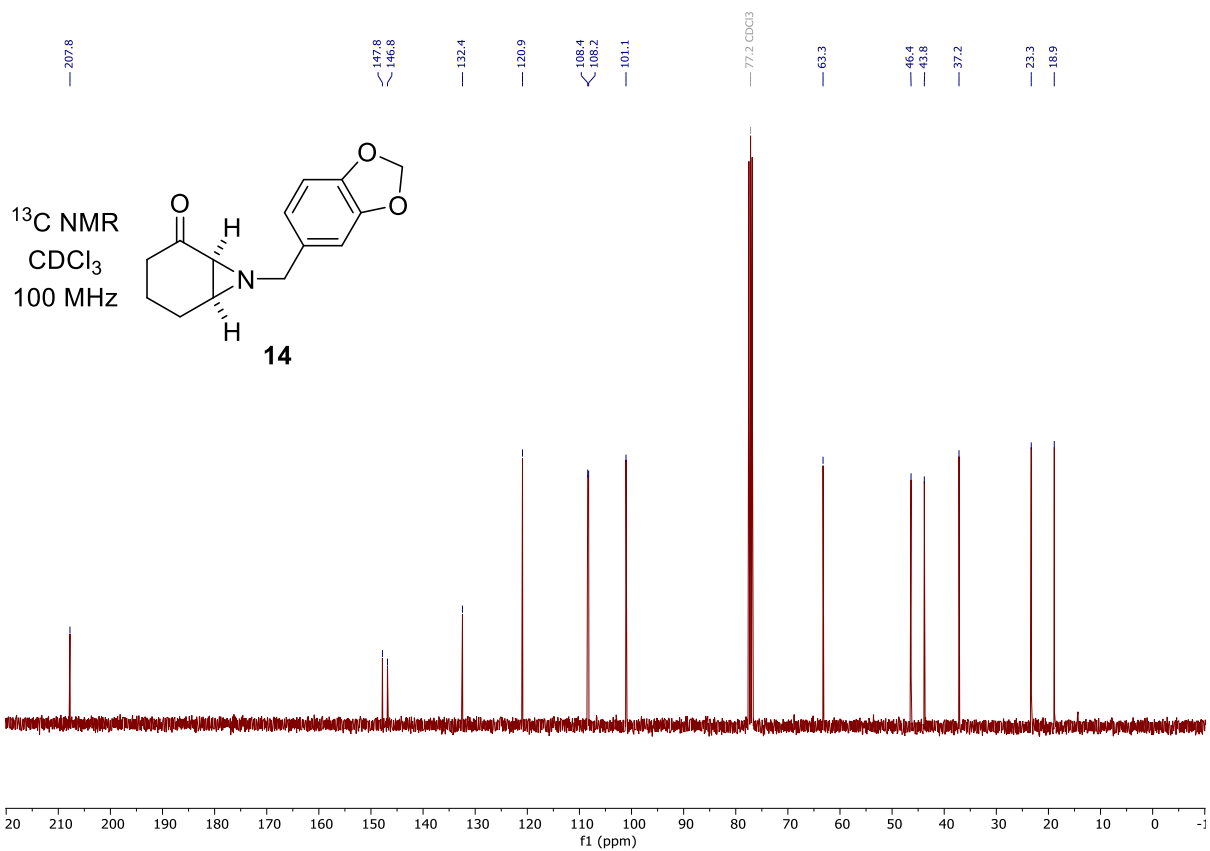

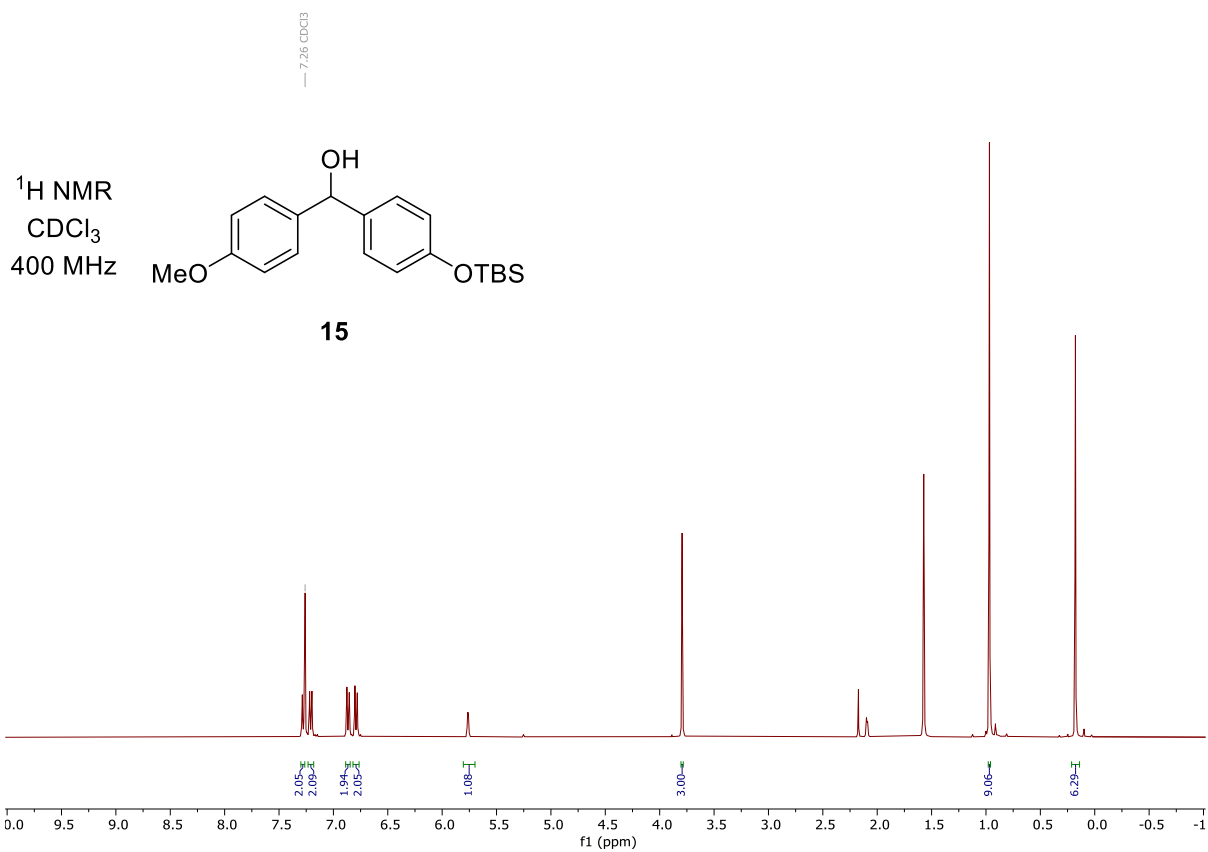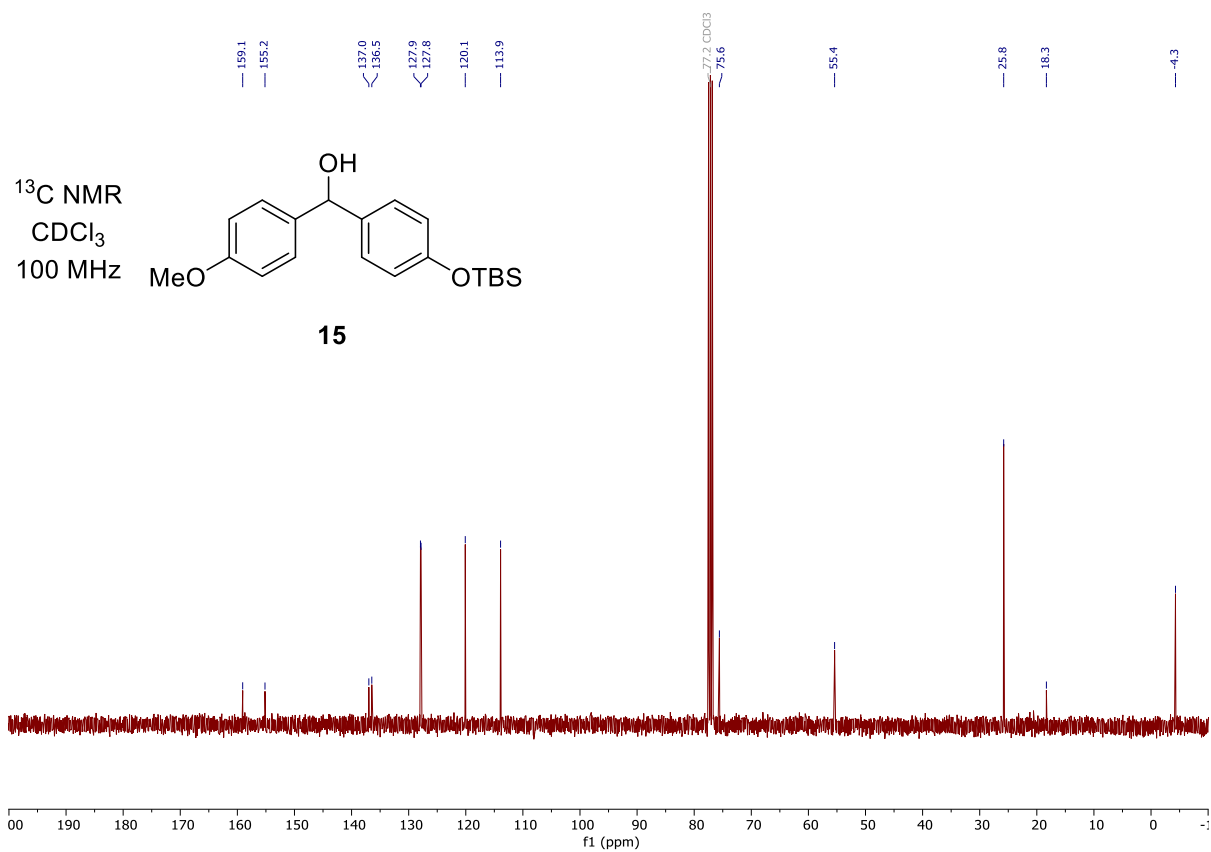

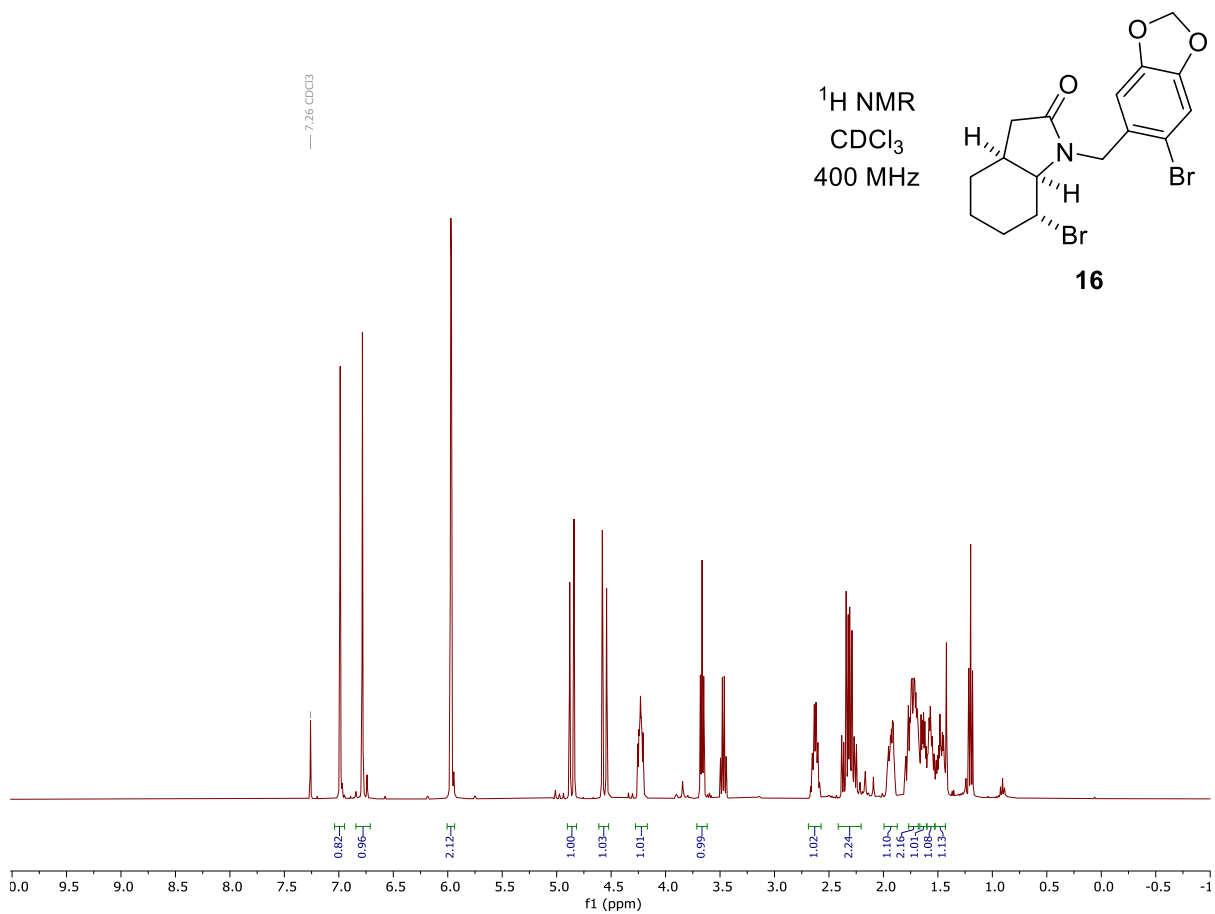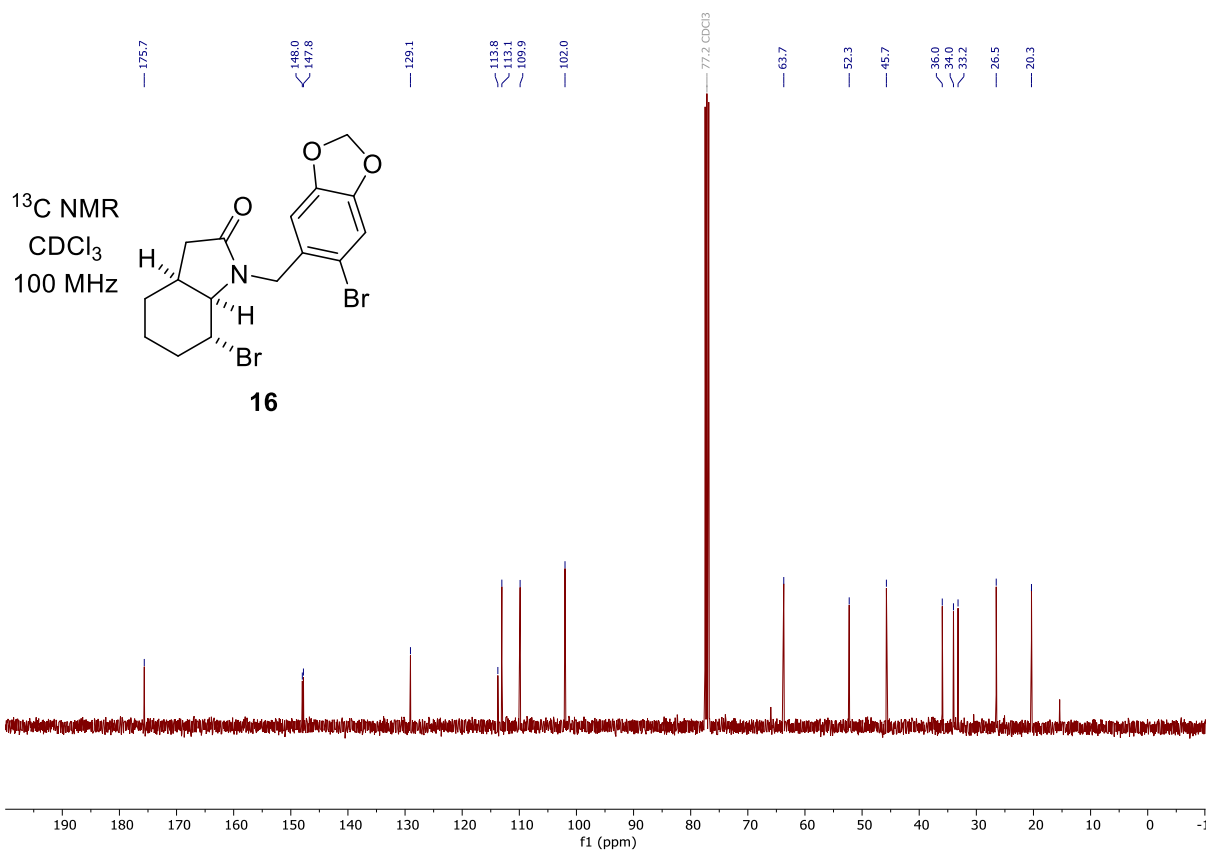



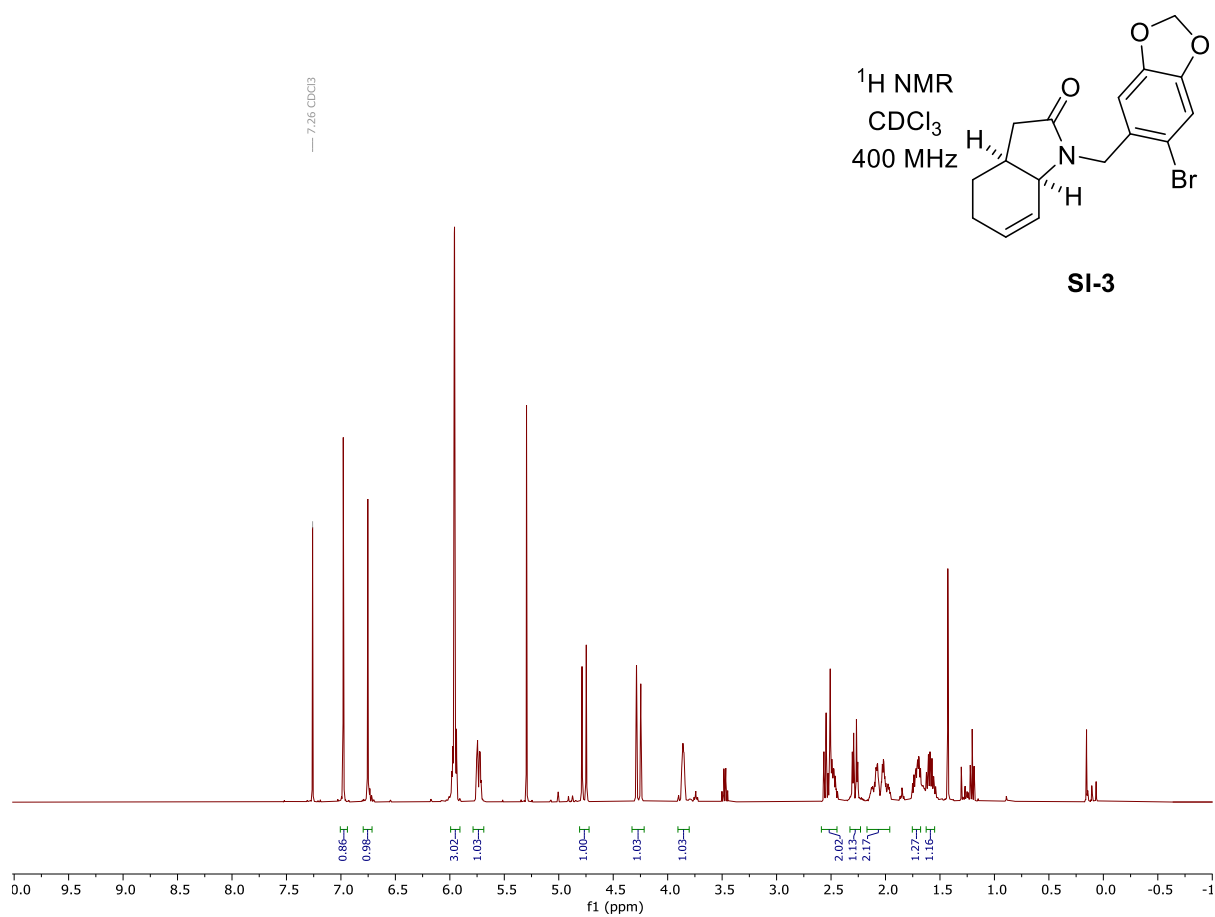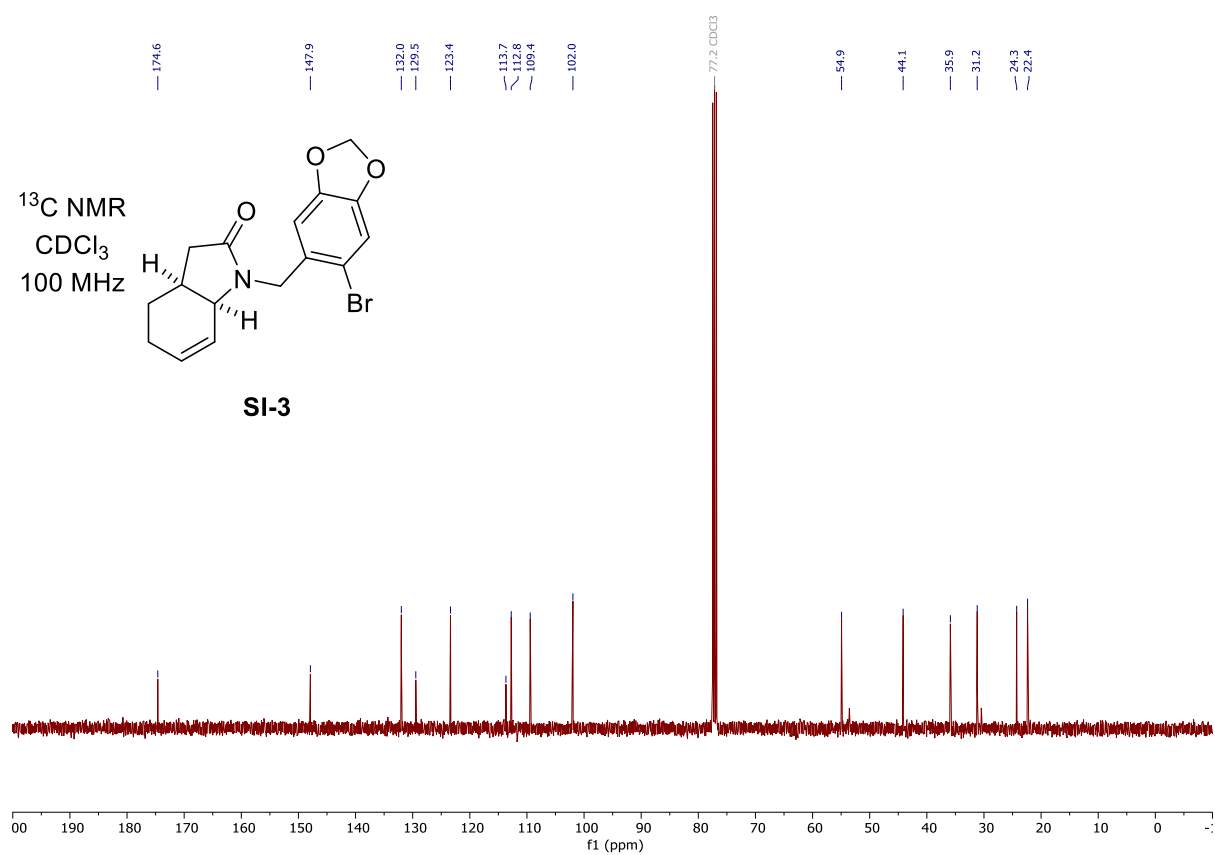

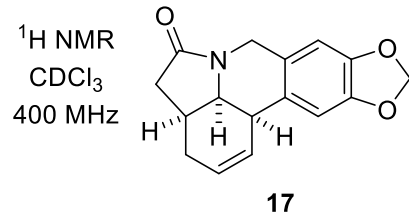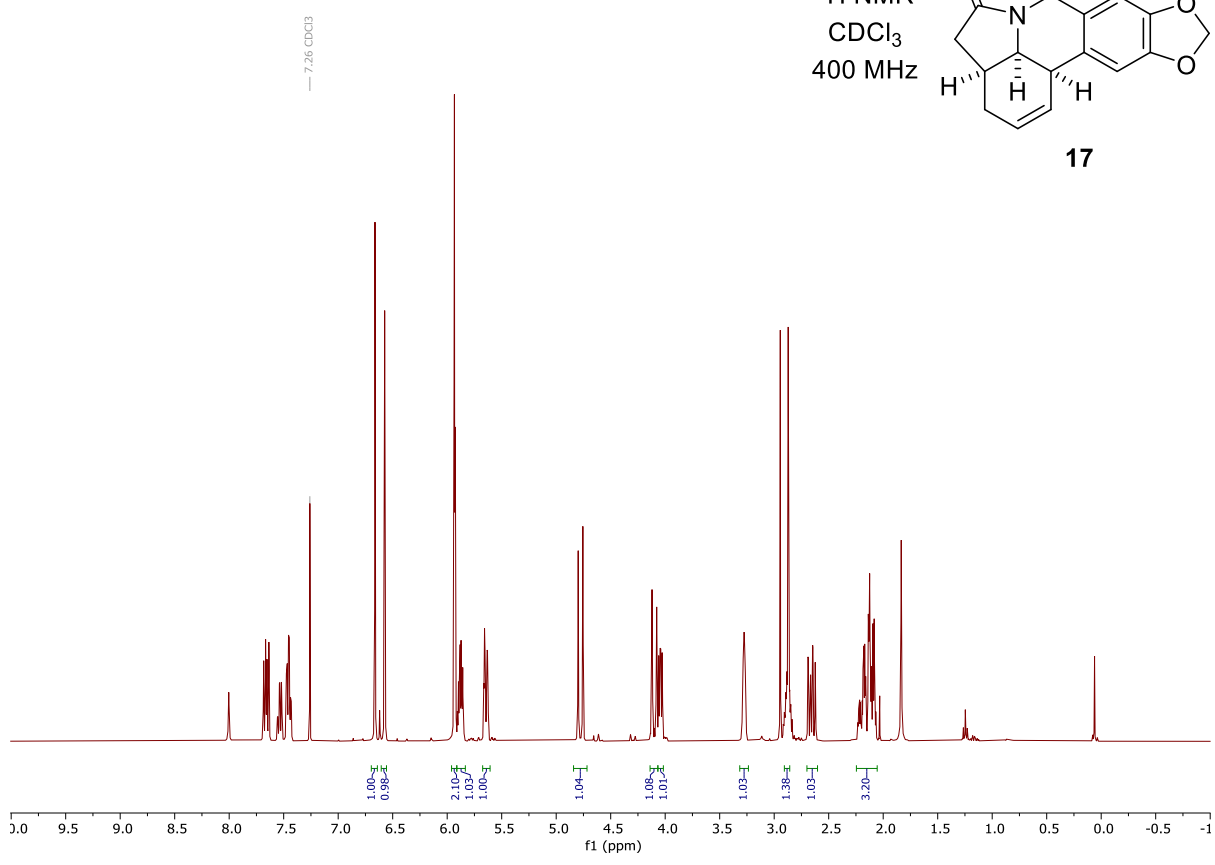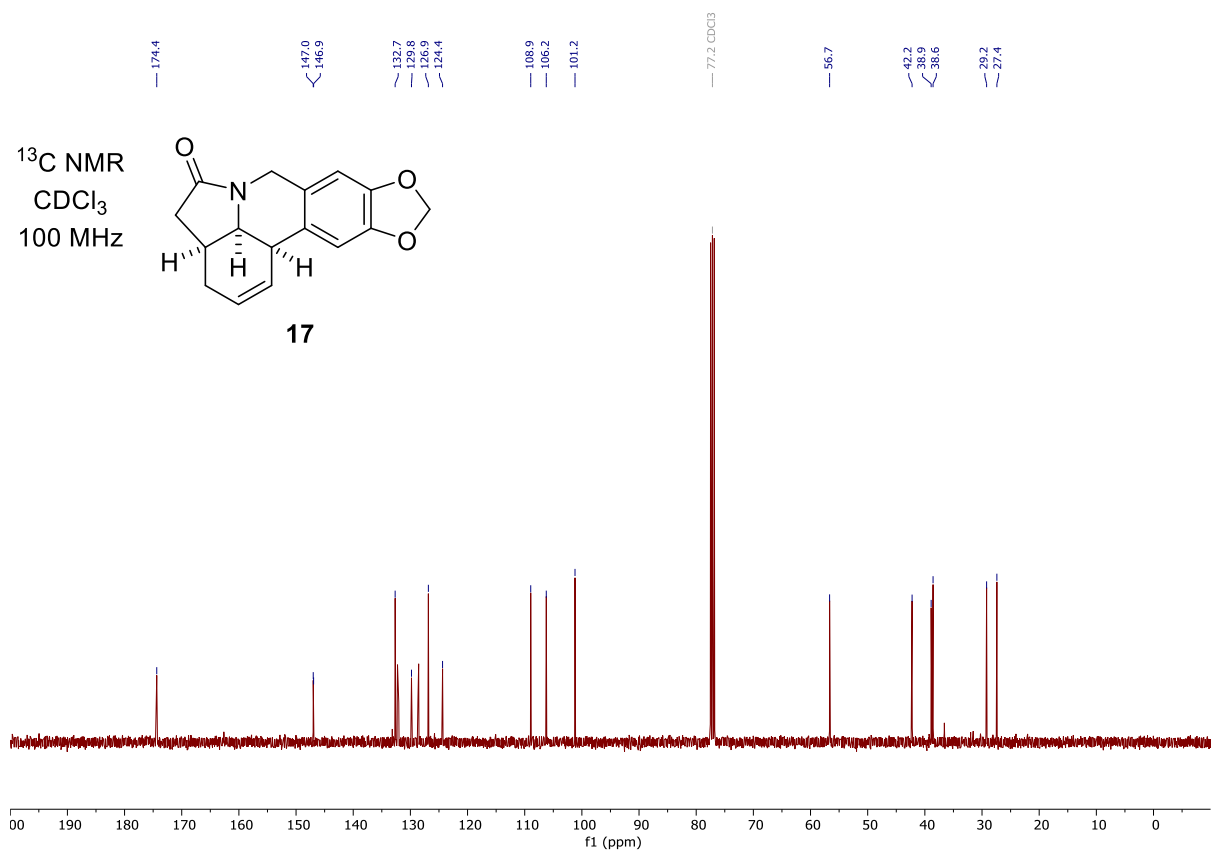

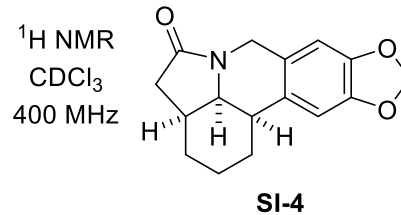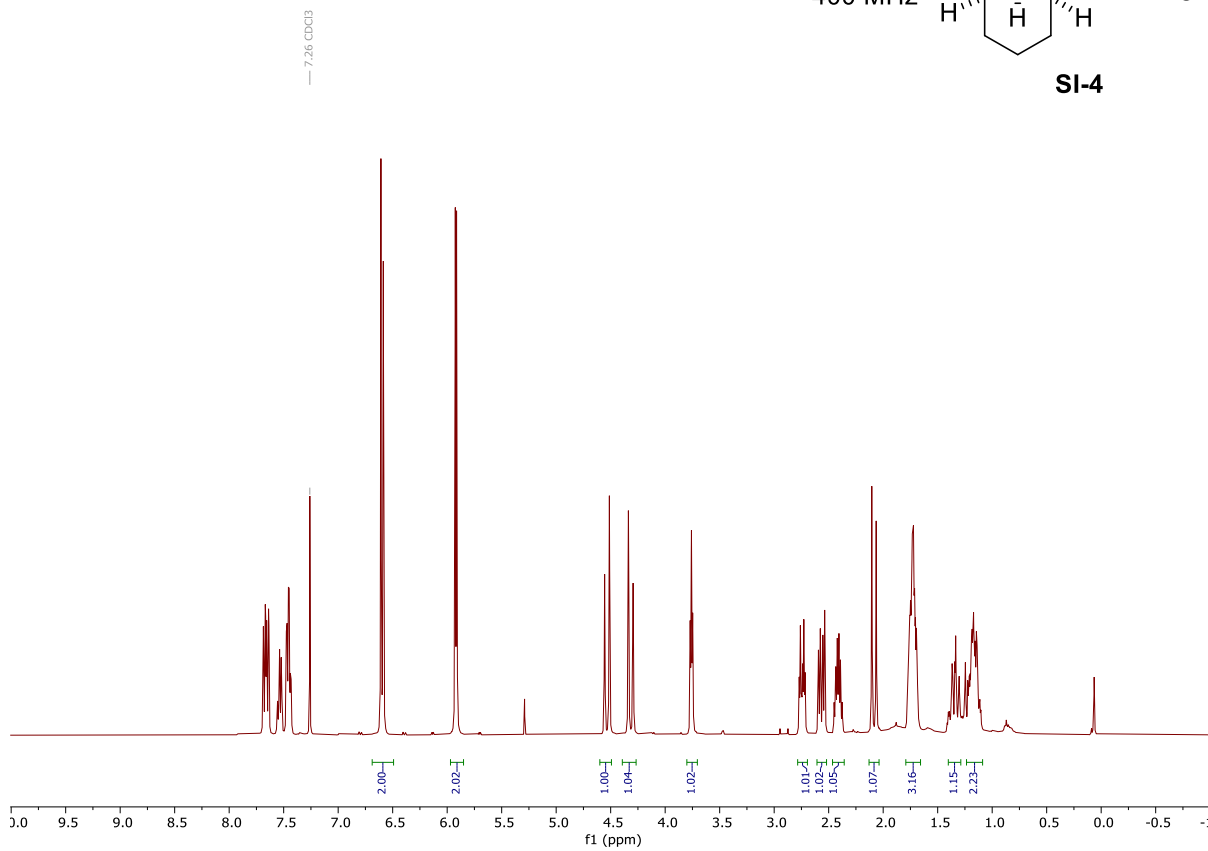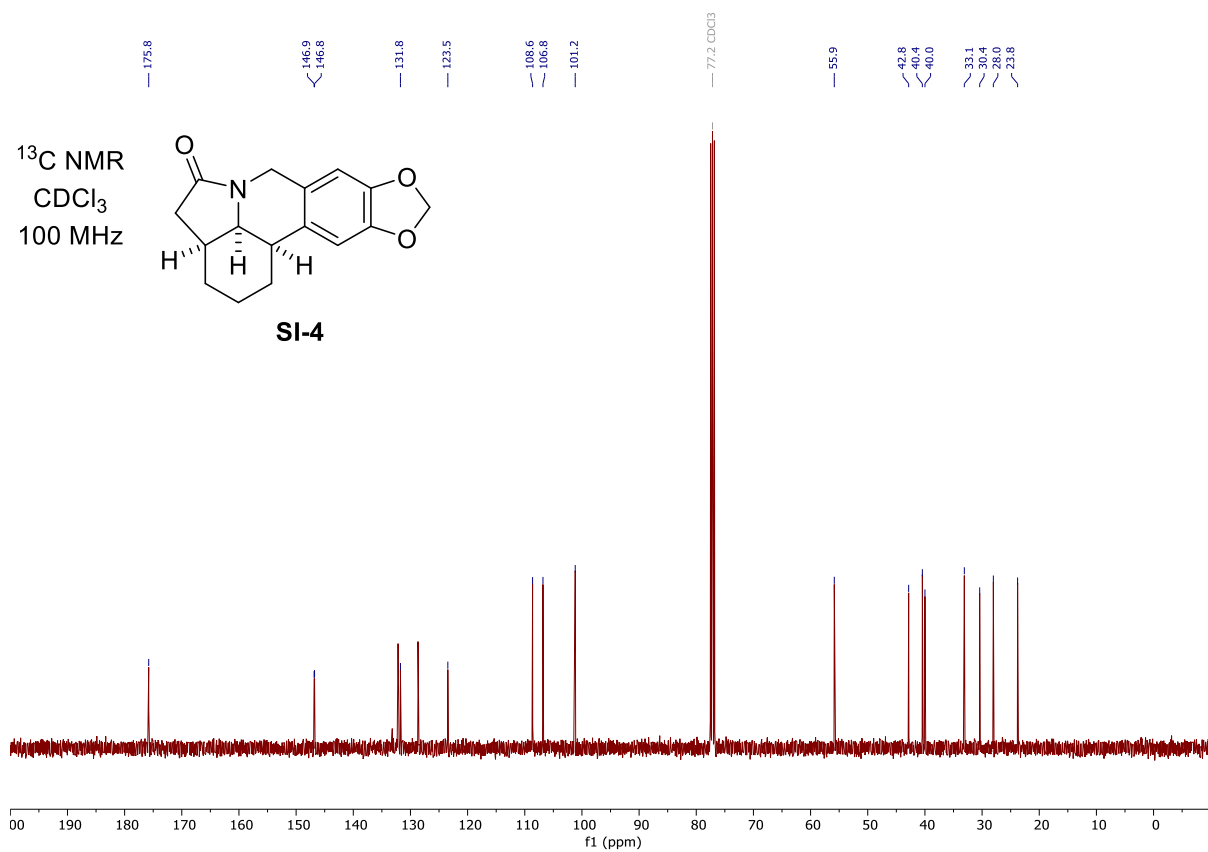

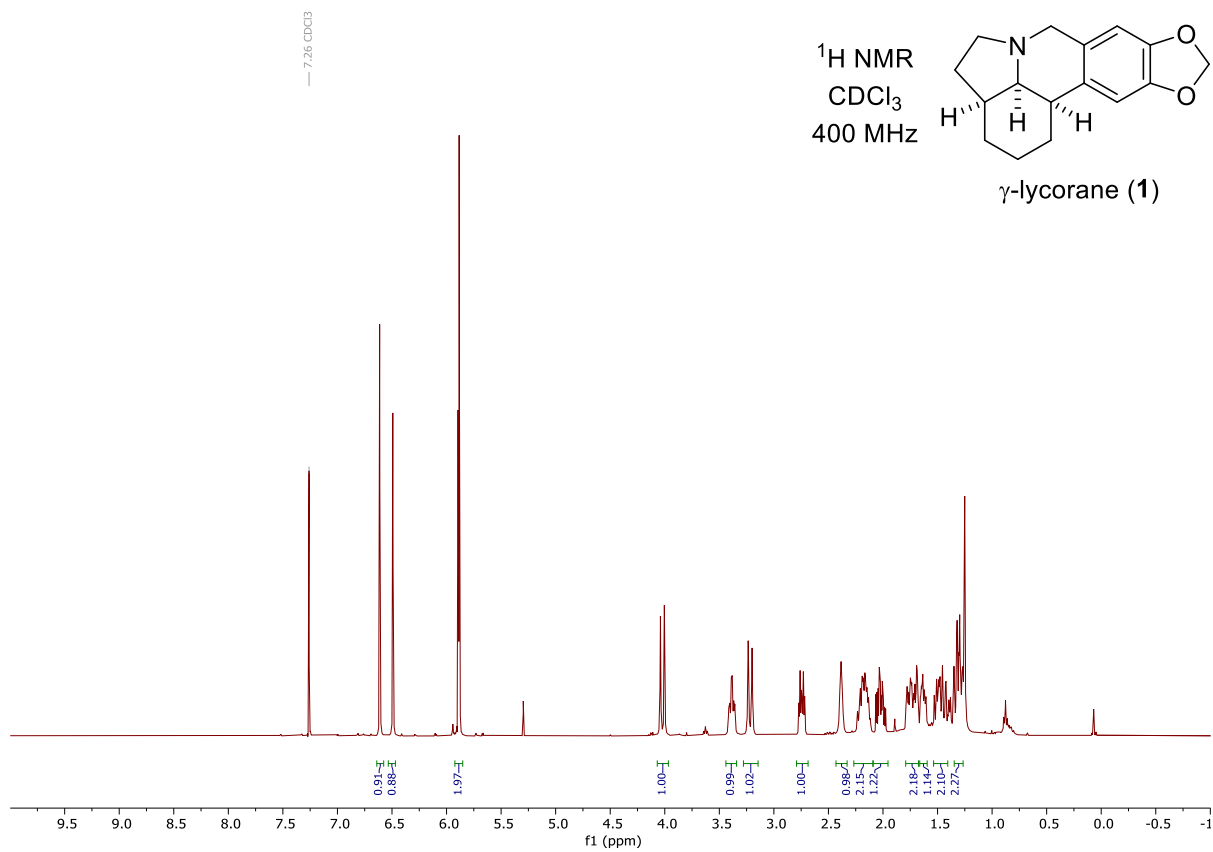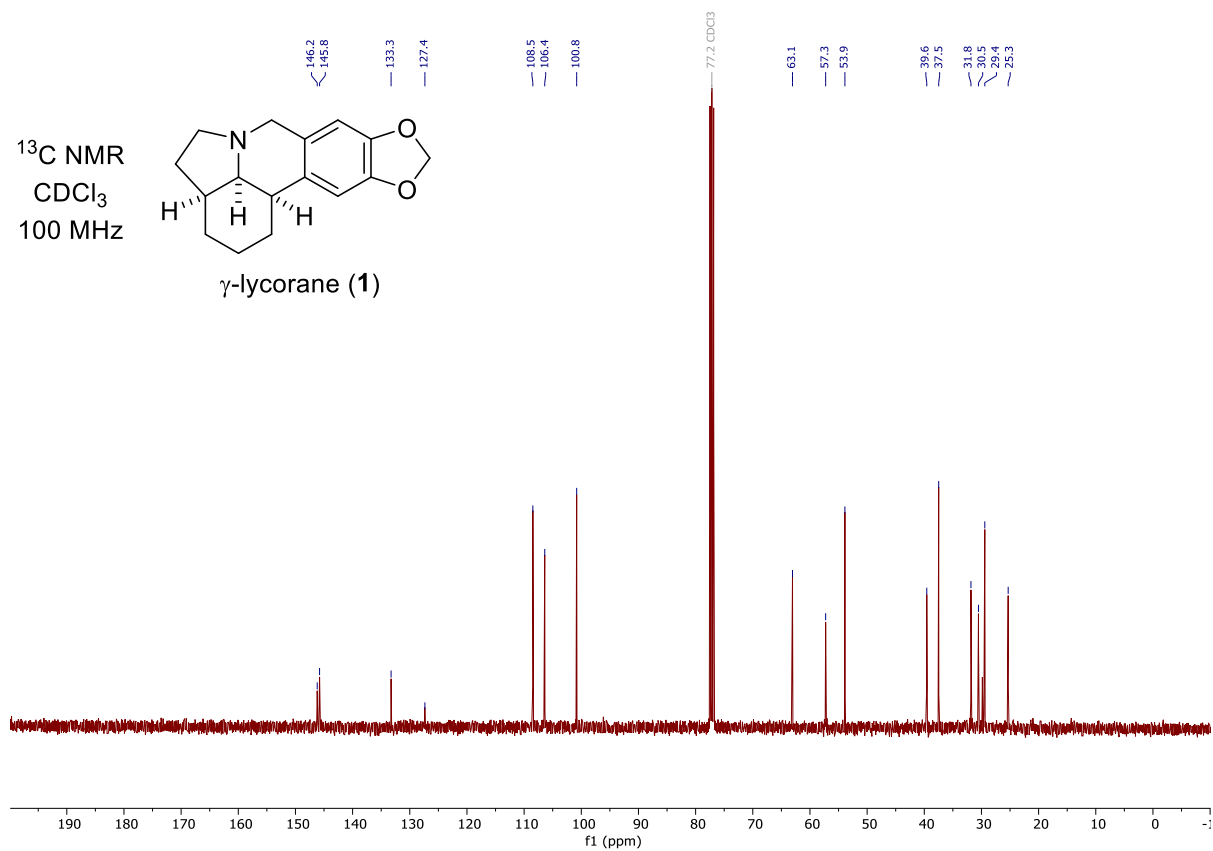

## 5. Chiral HPLC Traces

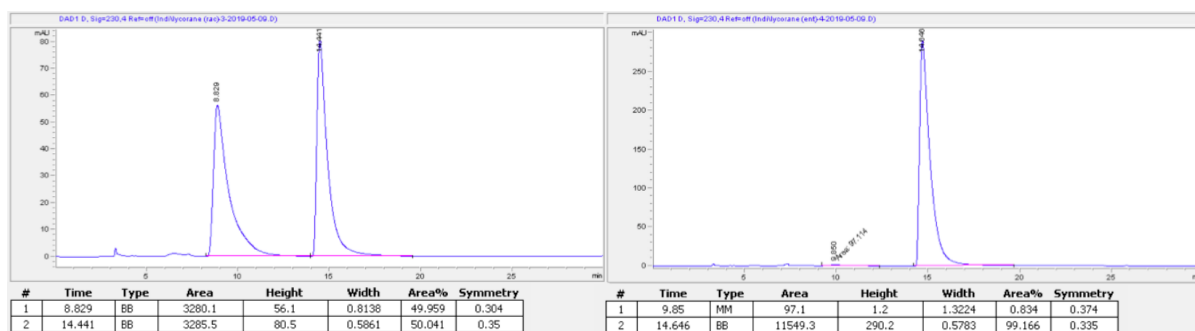

Figure SI-1: Chiral HPLC trace for racemic, and enantioenriched  $\gamma$ -lycorane (**1**)

## 6. X-Ray Crystallographic Data

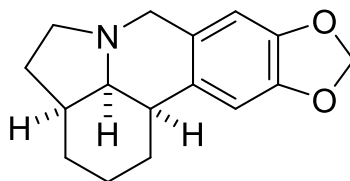

**Table SI-3** Crystal data and structure refinement for  $\gamma$ -lycorane (**1**).

|                                 |                                                  |                         |
|---------------------------------|--------------------------------------------------|-------------------------|
| Identification code with CCDC   | 2151105                                          |                         |
| Empirical formula               | C <sub>16</sub> H <sub>19</sub> N O <sub>2</sub> |                         |
| Formula weight                  | 257.33                                           |                         |
| Temperature                     | 150 K                                            |                         |
| Wavelength                      | 1.54184 Å                                        |                         |
| Crystal system                  | Triclinic                                        |                         |
| Space group                     | P -1                                             |                         |
| Unit cell dimensions            | a = 9.5572(6) Å                                  | $\alpha$ = 101.237(6)°. |
|                                 | b = 12.2819(10) Å                                | $\beta$ = 99.446(5)°.   |
|                                 | c = 12.4294(6) Å                                 | $\gamma$ = 110.609(7)°. |
| Volume                          | 1295.68(17) Å <sup>3</sup>                       |                         |
| Z                               | 4                                                |                         |
| Density (calculated)            | 1.319 Mg/m <sup>3</sup>                          |                         |
| Absorption coefficient          | 0.689 mm <sup>-1</sup>                           |                         |
| F(000)                          | 551.996                                          |                         |
| Crystal size                    | 0.19 x 0.15 x 0.05 mm <sup>3</sup>               |                         |
| Theta range for data collection | 3.748 to 76.818°.                                |                         |
| Index ranges                    | -12 ≤ h ≤ 12, -15 ≤ k ≤ 15, -15 ≤ l ≤ 15         |                         |
| Reflections collected           | 21905                                            |                         |
| Independent reflections         | 5401 [R(int) = 0.060]                            |                         |
| Completeness to theta = 75.281° | 99.6 %                                           |                         |
| Absorption correction           | Semi-empirical from equivalents                  |                         |
| Max. and min. transmission      | 0.97 and 0.74                                    |                         |

|                                      |                                             |
|--------------------------------------|---------------------------------------------|
| Refinement method                    | Full-matrix least-squares on F <sup>2</sup> |
| Data / restraints / parameters       | 5401 / 0 / 344                              |
| Goodness-of-fit on F <sup>2</sup>    | 0.9945                                      |
| Final R indices [ $I > 2\sigma(I)$ ] | R1 = 0.0665, wR2 = 0.1943                   |
| R indices (all data)                 | R1 = 0.0839, wR2 = 0.2173                   |
| Largest diff. peak and hole          | 0.28 and -0.26 e.Å <sup>-3</sup>            |

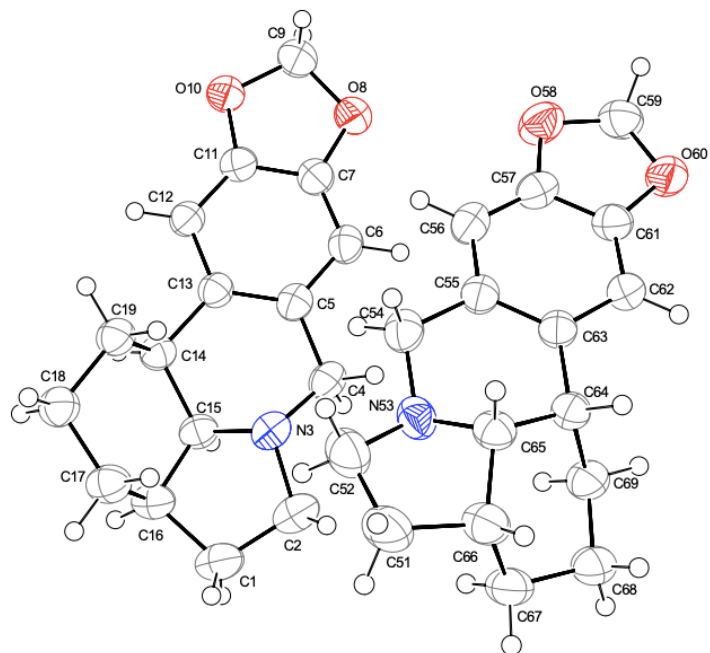

## 7. References

- [1] A. B. Pangborn, M. A. Gairdello, R. H. Grubbs, R. K. Rosen, F. J. Timmers, *Organometallics*, **1996**, *15*, 1518–1520.
- [2] *Purification of Laboratory Chemicals*, 3rd edition. D.D. Perrin, W. L. F. Armarego, Pergamon Press, Oxford, **1988**.
- [3] Y. Menjo, A. Hamajima, N. Sasaki, Y. Hamada, *Org. Lett.* **2011**, *13*, 5744–5747
- [4] L. Qin, Z. Zhou, J. Wei, T. Yan, H. Wen, *Synth. Commun.* **2010**, *40*, 642–646.
- [5] F. De Vincentiis, G. Bencivenni, F. Pesciaioli, A. Mazzanti, G. Bartoli, P. Galzerano, P. Melchiorre, *Chem.: Asian J.* **2010**, *5*, 1652–1656.
- [6] P. Kiprof, J. Li, C. L. Renish, E. K. Kalombo, V. G. Young, *J. Organomet. Chem.* **2001**, *620*, 113–118.
- [7] M. E. Krafft, J. W. Cran, *Synlett* **2005**, *2005*, 1263–1266.
- [8] S. L. Drew, A. L. Lawrence, M. S. Sherburn, *Angew. Chem. Int. Ed.* **2013**, *52*, 4221–4224.
- [9] N. S. Chandrakumar, B. B. Chen, M. Clare, B. N. Desai, S. W. Djuric, S. H. Docter, A. F. Gasiacki, R. A. Haack, C.-D. Liang, J. M. Miyashiro, et al., *LTA4 Hydrolase Inhibitors*, **2002**, EP1221441A2.
- [10] M. Ikeda, S. Ohtani, T. Sato, H. Ishibashi, *Synthesis* **1998**, *1998*, 1803–1806.
- [11] S. Nagumo, H. Takada, E. Yasui, Y. Sahara, Y. Chinen, H. Tanaka, Y. Morita, C. Kobiki, D. Narisawa, M. Mizukami, et al., *Heterocycles* **2011**, *83*, 555.
- [12] A. Monaco, B. R. Szulc, Z. X. Rao, M. Barniol-Xicota, M. Sehalia, B. M. A. Borges, S. T. Hilton, *Chem. Eur. J.* **2017**, *23*, 4750.
- [13] R. Rocaboy, D. Dailier, O. Baudoin, *Org. Lett.* **2018**, *20*, 772.
